# Supplementary material for: Oxygen vacancy engineering in spinel-structured nanosheet wrapped hollow polyhedra for electrochemical nitrogen fixation under ambient conditions
Source: Royal Society of Chemistry journal article supplement (doi:10.1039/c9ta11408d), 2020-01-01
Supplement: c9ta11408d1.pdf [file c9ta11408d1.pdf]

## Supporting Information

### **Oxygen vacancy engineering in spinel-structured nanosheets wrapped hollow polyhedrons for electrochemical nitrogen fixation at ambient conditions**

Feili Lai,<sup>a,c</sup> Jianrui Feng,<sup>a</sup> Xiaobin Ye,<sup>c</sup> Wei Zong,<sup>a</sup> Guanjie He,<sup>b\*</sup> Chao Yang,<sup>d</sup> Yue-E Miao,<sup>a</sup> Bicai Pan,<sup>c</sup> Wensheng Yan,<sup>c</sup> Tianxi Liu,<sup>a\*</sup> and Ivan P. Parkin<sup>b\*</sup>

<sup>a</sup>State Key Laboratory for Modification of Chemical Fibers and Polymer Materials, College of Materials Science and Engineering, Innovation Center for Textile Science and Technology, Donghua University, Shanghai 201620, P. R. China

<sup>b</sup>Christopher Ingold Laboratory, Department of Chemistry, University College London, 20 Gordon Street, London WC1H 0AJ, U.K

<sup>c</sup>Hefei National Laboratory for Physical Science at the Microscale, University of Science and Technology of China, Hefei, Anhui 230026, P. R. China

<sup>d</sup>Department of Materials Science and Engineering, College of Engineering, Peking University, Beijing 100871, P. R. China

## **Table of contents**

- 1. Material synthesis and characterization**
- 2. Theoretical calculation details**
- 3. Electrochemical performance measurements**
- 4. Supporting Figures and Tables**
- 5. References**

## 1. Materials synthesis and characterization:

All reagents were received from Aladdin Chemical Co., Ltd., and used without any purification.

**Synthesis of ZIF-67.** In the synthesis of ZIF-67, a methanolic solution (50 mL) of  $\text{Co}(\text{NO}_3)_2 \cdot 6\text{H}_2\text{O}$  (249 mg, 1.0 mmol) and 2-methylimidazole (328 mg, 4.0 mmol) were mixed under stirring. Then the mixture was kept reaction at room temperature for 24 h. The bright purple powder of ZIF-67 was collected by centrifugation, washed several times with methanol, and dried at 60 °C.

**Synthesis of hollow nitrogen-doped carbon polyhedron (HNCP).** Firstly, a homogeneous ZIF-67 dispersion (1 mg mL<sup>-1</sup>) was prepared, which contains 20 μL of aniline monomer. Subsequently, 30 mL of  $(\text{NH}_4)_2\text{S}_2\text{O}_8$  solution (31.7 mg mL<sup>-1</sup>) was slowly added to the above ZIF-67 dispersion, and was allowed to react overnight. The precipitates were collected by centrifugation, washed several times with deionized water, and dried at 60 °C. Furthermore, 1 M HCl solution was used to remove the ZIF-67 template, after which hollow PANI was obtained after centrifugation, washing and drying. Finally, hollow nitrogen-doped carbon polyhedron was obtained after carbonization at 800 °C for 3 h (ramp rate: 5 °C min<sup>-1</sup>) under N<sub>2</sub> flow. For comparison, another two nitrogen-doped carbon polyhedrons were synthesized by carbonizing the hollow PANI at 700 and 600 °C for 3 h (ramp rate: 5 °C min<sup>-1</sup>) under N<sub>2</sub> flow, which were denoted as HNCP(700) and HNCP(600), respectively.

**Synthesis of oxygen vacancy-rich  $\text{NiCo}_2\text{O}_4$  at hollow N-carbon polyhedron ( $V_o$ -rich  $\text{NiCo}_2\text{O}_4$ @HNCP).** Typically, 150 mg HNCP powder was dispersed into 30 mL of ethanol/water ( $v:v = 1:1$ ) solution containing 110 mg of  $\text{Ni}(\text{NO}_3)_2 \cdot 6\text{H}_2\text{O}$ , 221 mg of  $\text{Co}(\text{NO}_3)_2 \cdot 6\text{H}_2\text{O}$ , and 560 mg of methenamine (HMT) under ultrasonication. After reacting at 80 °C for 8 h, the solid product was centrifuged, washed with deionized water/ethanol, and dried at 60 °C, this product was named as nickel-cobalt layered double hydroxide nanosheet wrapped hollow nitrogen-doped carbon polyhedron (Ni-Co LDH@HNCP). Then, the Ni-Co LDH@HNCP powder was heated in air and oxygen atmospheres at 300 °C for 3 h to form oxygen vacancy-rich  $\text{NiCo}_2\text{O}_4$  at hollow N-carbon polyhedron ( $V_o$ -rich  $\text{NiCo}_2\text{O}_4$ @HNCP) and oxygen vacancy-poor

NiCo<sub>2</sub>O<sub>4</sub> at hollow N-carbon polyhedron (*V<sub>o</sub>*-poor NiCo<sub>2</sub>O<sub>4</sub>@HNCP), respectively. In addition, another two samples were synthesized by heating Ni-Co LDH@HNCP powder under air condition at 250 and 200 °C for 3 h, which were denoted as *V<sub>o</sub>*-rich NiCo<sub>2</sub>O<sub>4</sub>@HNCP-250 and *V<sub>o</sub>*-rich NiCo<sub>2</sub>O<sub>4</sub>@HNCP-200, respectively.

Replacing HNCP template by HNCP(700) and HNCP(600) templates, another two *V<sub>o</sub>*-rich NiCo<sub>2</sub>O<sub>4</sub>@HNCP(700) and *V<sub>o</sub>*-rich NiCo<sub>2</sub>O<sub>4</sub>@HNCP(600) samples were prepared by using the same step as *V<sub>o</sub>*-rich NiCo<sub>2</sub>O<sub>4</sub>@HNCP.

**Synthesis of oxygen vacancy-rich (*V<sub>o</sub>*-rich) Co@HNCP.** The *V<sub>o</sub>*-rich and *V<sub>o</sub>*-poor Co@HNCP products were synthesized similarly with the exception of the Ni(NO<sub>3</sub>)<sub>2</sub>•6H<sub>2</sub>O precursor.

**Synthesis of oxygen vacancy-rich (*V<sub>o</sub>*-rich) ZnCo@HNCP.** Typically, 150 mg of HNCP powder was dispersed by ultrasonication into 30 mL solution containing 111 mg of Zn(NO<sub>3</sub>)<sub>2</sub>•6H<sub>2</sub>O, 221 mg of Co(NO<sub>3</sub>)<sub>2</sub>•6H<sub>2</sub>O, and certain 30% hydrogen peroxide solution. After mixing all the precursors, the pH of the reactant solution was adjusted to 8 by adding 1 M NaOH solution under a nitrogen atmosphere. After the completion of the reaction, the solid product was centrifuged, washed with deionized water/ethanol, and dried at 60 °C. Then, the above powder was heated in air and oxygen atmospheres at 350 °C to form oxygen vacancy-rich (*V<sub>o</sub>*-rich) ZnCo@HNCP and oxygen vacancy-poor (*V<sub>o</sub>*-poor) ZnCo@HNCP, respectively.

**Characterization.** Transition electron microscopy (TEM) was carried out on a JEM-2100F electron microscopy. High-resolution TEM (HR-TEM, JEOL ARM 200F) was also operated at an acceleration voltage of 200 kV. X-ray diffraction (XRD) patterns were recorded on a Smartlab X-ray diffractometer (Cu K<sub>α</sub>, λ = 0.1542 nm). X-ray photoelectron spectra (XPS) were acquired by an ESCALAB MK II with Mg K<sub>α</sub> as the excitation source. The binding energies obtained in the XPS spectral analysis were corrected for specimen charging by referencing C 1s to 284.8 eV. X-ray absorption spectroscopy (XAS) spectra at O *K*-edge, Co *L*-edge and Ni *L*-edge were measured on beamline U19 at National Synchrotron Radiation Laboratory, China. The beam from a bending magnet was monochromatized with a varied line-spacing plane grating monochromator and refocused by a toroidal mirror. N<sub>2</sub> physisorption experiments

were carried out at  $-196\text{ }^{\circ}\text{C}$  with 40-60 mg sample on a Quadrasorb apparatus from Quantachrome Instruments. Prior to all measurements, the samples were outgassed under vacuum at  $150\text{ }^{\circ}\text{C}$  for 20 h. Specific surface areas (SSAs) were calculated using the multi-point Brunauer-Emmett-Teller (BET) model ( $p/p_0 = 0.05-0.2$ ). Total pore volumes ( $V_t$ ) were determined at  $p/p_0 = 0.95$ . SSAs and  $V_t$  were calculated from the data obtained by measurements with 40-60 mg sample. Pore size distributions were calculated using the quenched-solid density functional theory (QSDFT) method (adsorption branch kernel) for  $\text{N}_2$  adsorbed on carbon with a slit/cylindrical pore shape at  $-196\text{ }^{\circ}\text{C}$ . Thermogravimetric analysis (TGA) was conducted with a Netzsch TG 209 F1 device under a constant artificial air flow with a heating rate of  $10\text{ }^{\circ}\text{C min}^{-1}$ .

1.

## **2. Theoretical calculation details:**

The Density functional theory (DFT) based computations were implemented by the Vienna *ab initio* simulation package (VASP), with ion-electron interactions depicted by projector augmented waves (PAW) and the exchange and correlation potential described by the function of Perdew, Burke and Ernzerhof (PBE)<sup>[1]</sup> based on the generalized gradient approximation (GGA). In this calculation,  $3 \times 3 \times 1$  and  $11 \times 11 \times 1$  Monkhorst-Pack<sup>[2]</sup> sampled  $k$  points was used for geometry optimizations and density of states calculations, respectively. Cut-off energy of 400 eV was adopted. The vacuum space is set to be at least 15 Å to separate the interactions between the neighboring slabs. Criteria of convergence was set to  $1 \times 10^{-4}$  eV and 0.01 eV/Å for the self-consistent field (SCF) and ion steps, respectively. The nudged elastic band (NEB) method was used for searching the transition state of the reaction.<sup>[3]</sup> Spin polarization was considered in all calculations. For depicting the surface of NiCo<sub>2</sub>O<sub>4</sub>, we selected (001) facet for calculating the vacancy formation energy, adsorption energy and the free energy diagram. The vacancy formation energy is referred to O<sub>2</sub> and the NNH adsorption energy is referred to N<sub>2</sub> and H<sub>2</sub>. The free energy diagram is plotted at equilibrium potential as  $\Delta G = \Delta E + \Delta ZPE - T\Delta S + neU$ , where the each item presents free energy, DFT derived energy, zero-point energy, entropy contribution to the free energy and electrode potential contribution to the free energy. Other details follow the previous research.<sup>[4]</sup>

### 3. Electrochemical performance measurements:

**Cathode preparation.** Typically, approximately 1 mg of catalyst and 30  $\mu\text{L}$  of Nafion solution (5 wt%) were dispersed in 100  $\mu\text{L}$  of absolute ethanol by sonicating for 1 h to form a homogeneous ink. Then, 30  $\mu\text{L}$  of the homogeneous ink was loaded onto a carbon paper electrode with an area of  $1 \times 1 \text{ cm}^2$  and dried under ambient condition.

**Electrochemical NRR measurements.** Before NRR tests, Nafion membrane was protonated by first boiling in  $\text{H}_2\text{O}_2$  5% aqueous solution for 1 h, then in water for another hour, followed by 3 h in 0.5 M  $\text{H}_2\text{SO}_4$ , and finally washed by water several time and kept in water for 6 h. All steps were performed at 80  $^\circ\text{C}$ .<sup>[5]</sup> The Nafion membranes were detected with almost no  $\text{NH}_3$  contamination before use. All the electrochemical measurements were carried out on a CHI660B electrochemical workstation (CH Instruments, Inc., Shanghai) with a standard three-electrode system at room temperature (25  $^\circ\text{C}$ ), by using prepared electrodes, graphite plate and Ag/AgCl electrode as working electrode, counter electrode, and reference electrode, respectively. All the electrochemical measurements were carried out in a sealed container, which will minimize the possibility of contamination from the external environment.<sup>[6,7]</sup> The potentials reported in this work were converted to reversible hydrogen electrode (RHE) with the following equation:

$$E_{\text{RHE}} = E_{\text{Ag/AgCl}} + 0.059\text{pH} + E^0_{\text{Ag/AgCl}} \quad (E^0_{\text{Ag/AgCl}} = 0.197 \text{ V}) \quad (1)$$

All inlet pressure of the gas was controlled as 1~3 bar. The open circuit potential experiment of Ar-saturated electrolyte were conducted by purging Ar ( $\geq 99.999\%$  purity from WUHAN NEWRADAR SPECIAL GAS CO., LTD.) at a flow rate of 20  $\text{cm}^3 \text{ min}^{-1}$  controlled by a mass flow meter (Beijing Sevenstar Flow Co.,Ltd.) for 2 h. For  $\text{N}_2$  reduction experiments, the electrolyte of 0.1 M  $\text{Na}_2\text{SO}_4$  solution was pre-purged with  $\text{N}_2$  gas ( $\geq 99.99\%$  from products description and  $\geq 99.999\%$  purity according to pre-delivery inspection for  $^{14}\text{N}_2$  and  $\geq 99.999\%$  from products description for high-purity  $^{14}\text{N}_2$ , WUHAN NEWRADAR SPECIAL GAS CO., LTD.;  $\geq 98.5\%$  purity for  $^{15}\text{N}_2$ , Aladdin Chemical Co., LTD.) for 0.5 h before the measurement with different gas flow rate (20 ~ 100  $\text{cm}^3 \text{ min}^{-1}$ ), in which a Nafion

membrane separated two-compartment cell with the total volume of 20 mL electrolyte was applied. NRR tests were also conducted under different temperatures (0, 20, 40, and 60 °C) by using circulating water, based on which the temperature-dependent reaction rate can be evaluated by the following Arrhenium equation:

$$v = Ae^{-\frac{E_a}{RT}} \quad (2)$$

Where  $v$  is reaction rate,  $A$  is Arrhenius constants,  $E_a$  is activation energy,  $R$  is gas constant and  $T$  is reaction temperature under the absolute scale.

**Determination of ammonia.** Concentration of produced ammonia was spectrophotometrically determined by the indophenol blue method. First, 2 mL of reaction solution was removed from the electrochemical reaction cell, followed by adding 2 mL of a 1 M NaOH solution containing 5 wt% sodium citrate and 5 wt% salicylic acid, 1 mL of 0.05 M NaClO, and 0.2 mL of an aqueous solution of 1 wt% sodium nitroferricyanide ( $C_5FeN_6Na_2O$ ). After reacting 2 h at room temperature, the corresponding absorption spectrum was measured using ultraviolet-visible spectrophotometer, from which the as-formed indophenol blue can be determined using the absorbance at a wavelength of 660 nm. The concentration-absorbance curve was calibrated using standard  $NH_4Cl$  solution with  $NH_4^+$  concentrations of 0.00, 0.16, 0.32, 0.48, 0.64, 0.80, 1.00, and 2.00  $\mu g mL^{-1}$  in 0.1 M  $Na_2SO_4$  solution. It was shown in Figure S15. The rate of ammonia formation was calculated using the following equation:

$$v_{NH_3} = (c_{NH_3} \times V) / (t \times A \text{ or } m) \quad (3)$$

Where  $v_{NH_3}$  is the rate of ammonia formation,  $c_{NH_3}$  is the measured  $NH_3$  concentration,  $V$  (mL) is the volume of electrolyte,  $t$  (h) is the reduction reaction time, and  $A$  or  $m$  is the geometric area ( $cm^2$ ) or  $m$  (mg) of the catalysts on cathode.

**Determination of Faradaic Efficiency (FE).** The Faradaic efficiency for NRR was defined as the quantity of electric charge used for synthesizing ammonia divided the total charge passed through the electrodes during the electrolysis. Assuming three electrons were needed to produce on  $NH_3$  molecule, the Faradaic efficiency can be calculated using the following equation:



$$FE = 3F \times c_{\text{NH}_3} \times V / (17 \times Q) \quad (4)$$

Where  $F$  is the Faradaic constant,  $Q$  is the quantity of applied electricity.

**$^{15}\text{N}_2$  isotope labeling experiments.** An isotopic labeling experiment by using  $^{15}\text{N}_2$  as the feed gas was conducted to clarify the source of ammonia. Before the measurements, the  $^{15}\text{N}_2$  gas was purified according to the reported Cu trap process.<sup>[6]</sup>  $\text{NO}_x$  contamination in both  $^{14}\text{N}_2$  and purified  $^{15}\text{N}_2$  gas were also checked *via* purging  $^{14}\text{N}_2$  and  $^{15}\text{N}_2$  into electrolyte for 2 h by Nitrite (ULR) Handheld Colorimeter showing 0~6 ppb. After  $^{15}\text{N}_2$  electroreduction at -0.25 V (*vs.* RHE) in 0.1 M  $\text{Na}_2\text{SO}_4$  electrolyte for 2 h, the obtained  $^{15}\text{NH}_4^+$  was quantitatively determined by  $^1\text{H}$  nuclear magnetic resonance (NMR, Bruker UTRASHIELD 400 PLUS). The calibration curves were obtained as follows. Firstly, a series of  $^{15}\text{NH}_4^+$  solutions with specific concentrations (0, 0.32, 0.64, 1, and 2  $\mu\text{g mL}^{-1}$ ) were prepared in 0.1 M  $\text{Na}_2\text{SO}_4$  solution; secondly, 1 mL of the mixture was identified using  $^1\text{H}$  NMR spectroscopy (100  $\mu\text{L}$  of deuterium oxide  $\text{D}_2\text{O}$  was added before NMR detection); thirdly, the calibration was achieved using the peak area ratio of  $^{15}\text{NH}_4^+$ , where the peak area for 2  $\mu\text{g mL}^{-1}$  solution is regarded as a standard. Similarly, the amount of  $^{14}\text{NH}_4^+$  was quantitatively determined by using this method when  $^{14}\text{N}_2$  was used as the feed gas.<sup>[6-10]</sup> Qualitative measurement were conducted by the similar process on NMR (AVANCE3HD 600 MHz).

**Determination of hydrazine.** The  $\text{N}_2\text{H}_4$  presented in 0.1 M  $\text{Na}_2\text{SO}_4$  solution was estimated by the method of Watt and Chrisp.<sup>[11]</sup> A mixture of *p*- $\text{C}_9\text{H}_{11}\text{NO}$  (5.99 g), HCl (concentrated, 30 mL), and  $\text{C}_2\text{H}_5\text{OH}$  (300 mL) was used as a color reagent.

#### 4. Supporting Figures and Tables:

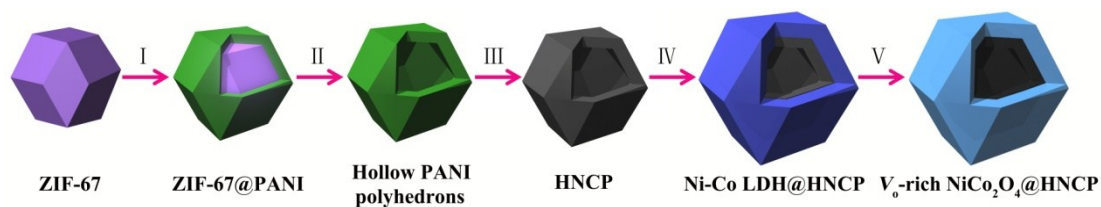

**Figure S1.** Schematic illustration of the synthesis of the  $V_0$ -rich  $NiCo_2O_4@HNCP$ . (Here, step I ~V presents *in-situ* polymerization, ZIF removal, carbonization, water bath co-deposition, and annealing, respectively.)

Firstly, rhombic dodecahedral zeolitic imidazolate framework-67 (ZIF-67) was fabricated as a sacrificial template to anchor a uniform polyaniline layer by an *in-situ* polymerization process. After removal of ZIF-67 template by acid etching, a hollow polyaniline polyhedron was generated. Furthermore, hollow nitrogen-doped carbon polyhedron (HNCP) was obtained by a one-step pyrolysis, which is regarded as a strong matrix for solution co-deposition of nickel-cobalt layered double hydroxides (Ni-Co LDH) nanosheets. Finally,  $V_0$ -rich  $NiCo_2O_4@HNCP$  was successfully obtained after an annealing process under air.

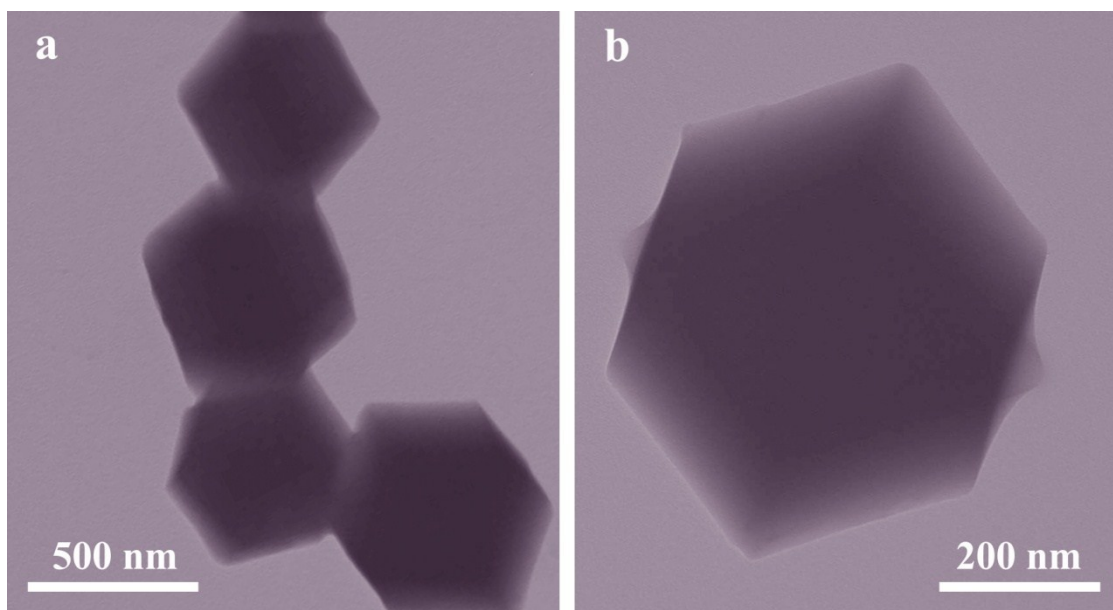

**Figure S2.** a, b) Transmission electron microscopy (TEM) images of ZIF-67 crystals under different magnifications.

The ZIF-67 crystals of rhombic dodecahedral shape with a diameter of 400 nm were obtained by mixing a methanolic solutions of cobalt nitrate and dimethylimidazole, and keeping the reaction at room temperature (Figure S1).

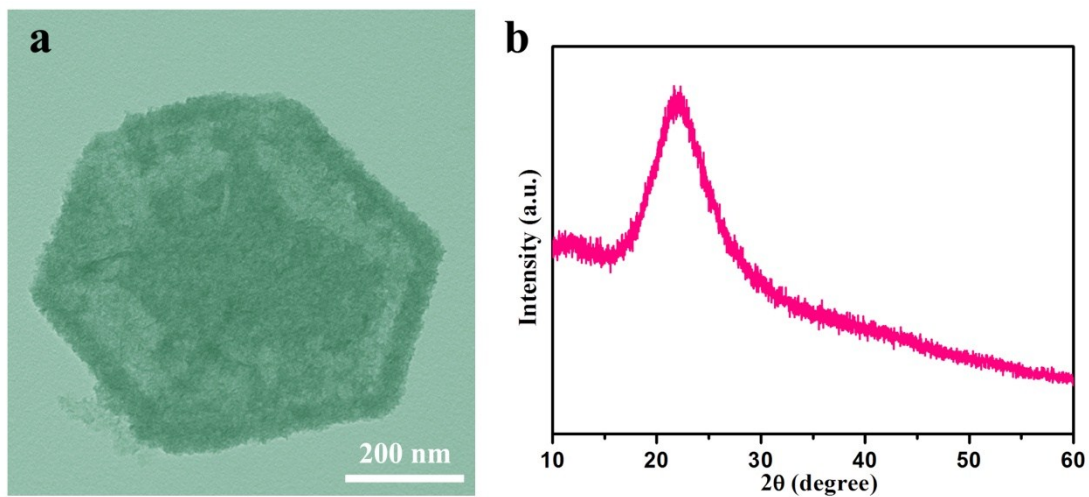

**Figure S3.** a) TEM image and b) X-ray diffraction (XRD) pattern of HNCP.

The obvious peak at  $2\theta = 22.4^\circ$  belongs to a typical (002) interlayer peak of graphite-type carbon (Figure S2), indicating an amorphous structure of the nitrogen-doped carbon template of HNCP.

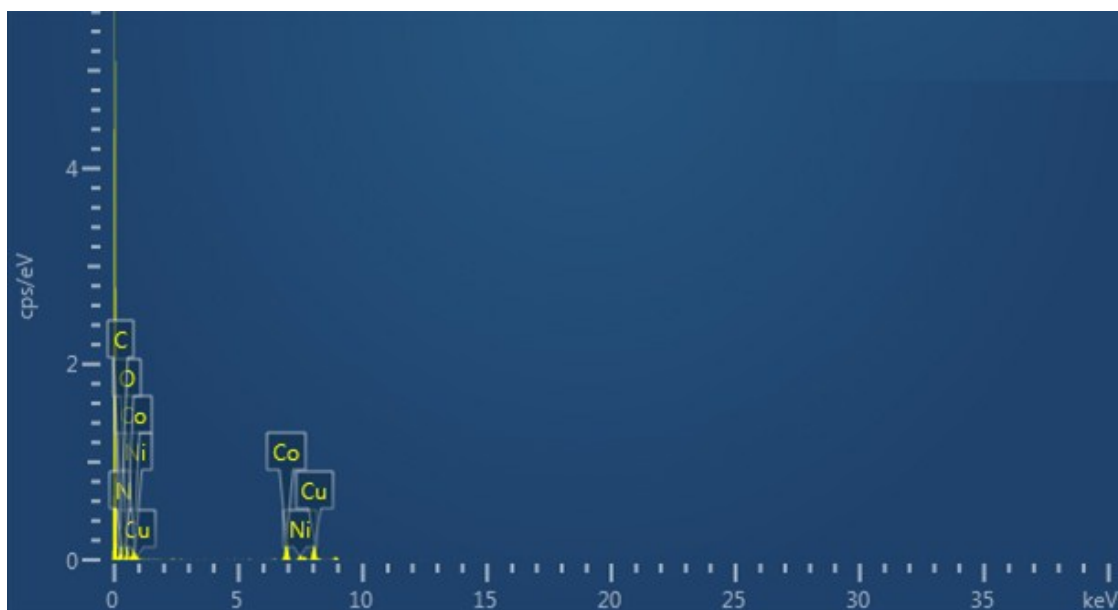

**Figure S4.** The corresponding energy dispersive spectroscopy (EDS) spectrum of the as-obtained  $V_o$ -rich  $NiCo_2O_4@HNCP$ .

The corresponding energy dispersive spectroscopy (EDS) spectrum in Figure S4 reveals the existence of Ni, Co, C, N, and O elements in the as-obtained  $V_o$ -rich  $NiCo_2O_4@HNCP$ .

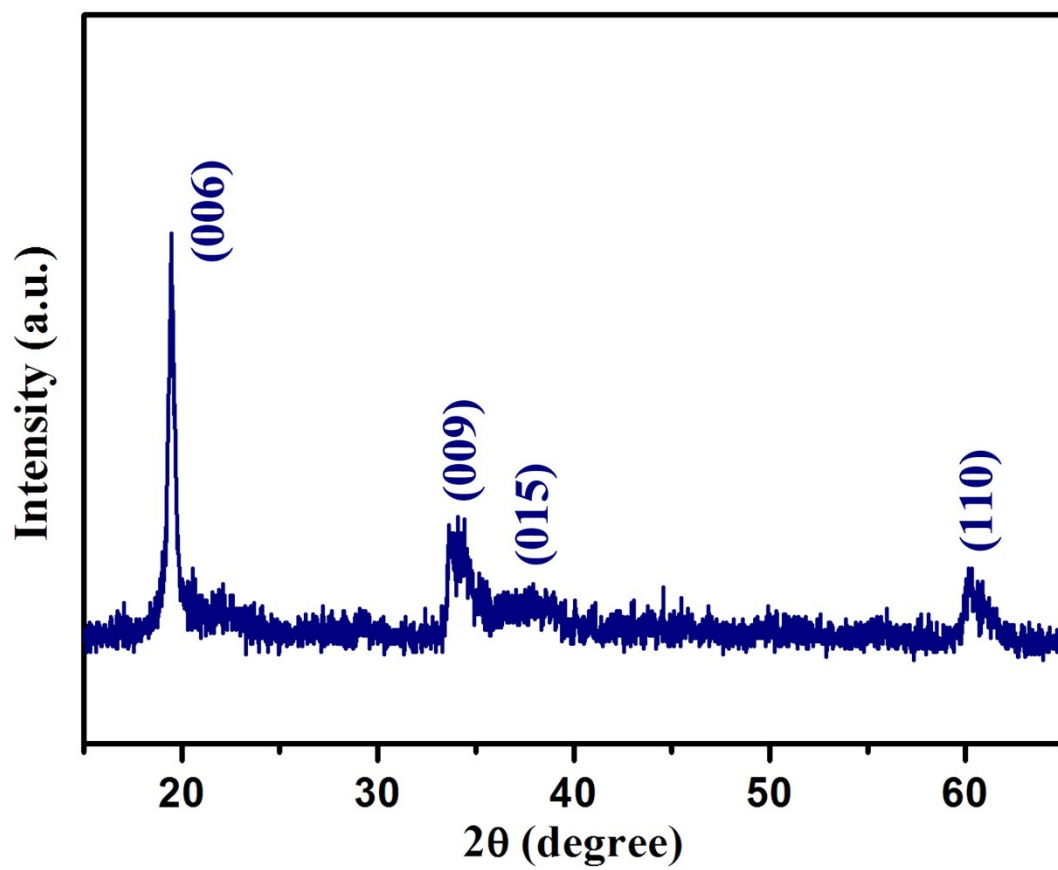

**Figure S5.** XRD pattern of Ni-Co LDH@HNCP.

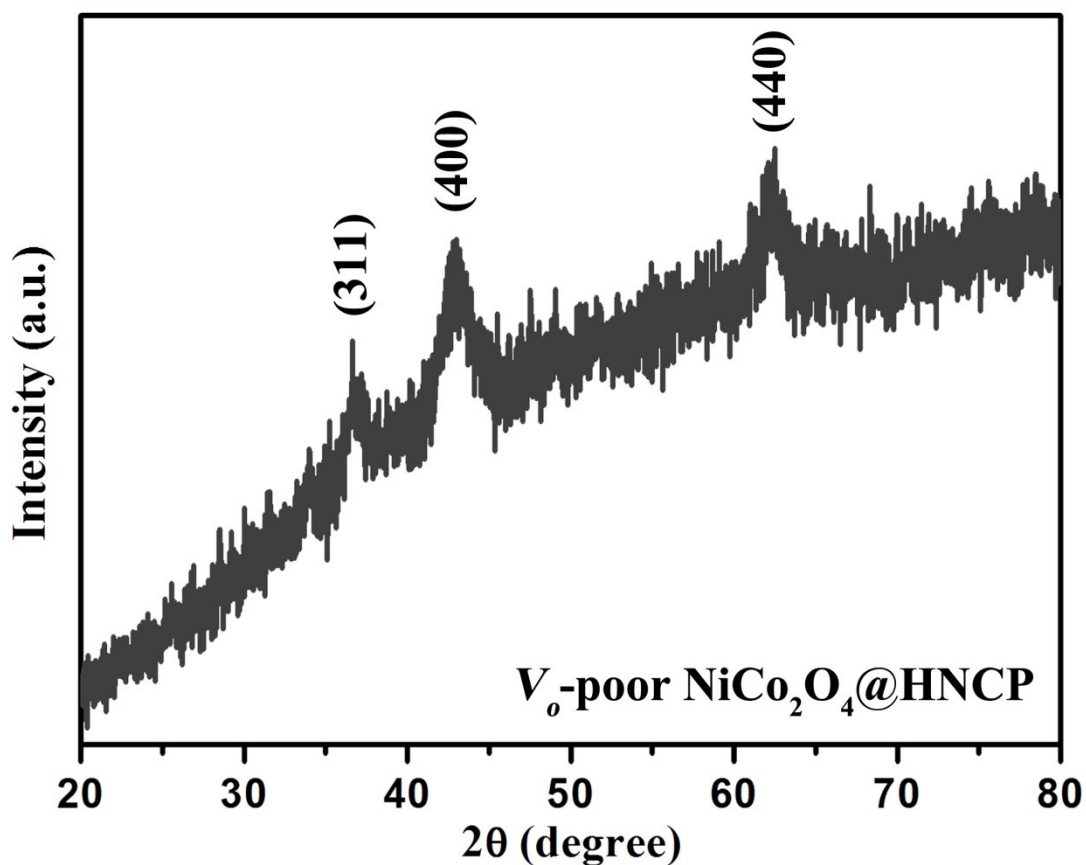

**Figure S6.** XRD pattern of  $V_o$ -poor  $NiCo_2O_4@HNCP$ .

As shown in Figure S6, the  $V_o$ -poor  $NiCo_2O_4@HNCP$  also shows the typical XRD pattern as  $V_o$ -rich  $NiCo_2O_4@HNCP$ , implying the slightly introduction of oxygen vacancies in  $NiCo_2O_4$  did not change its crystal structure.

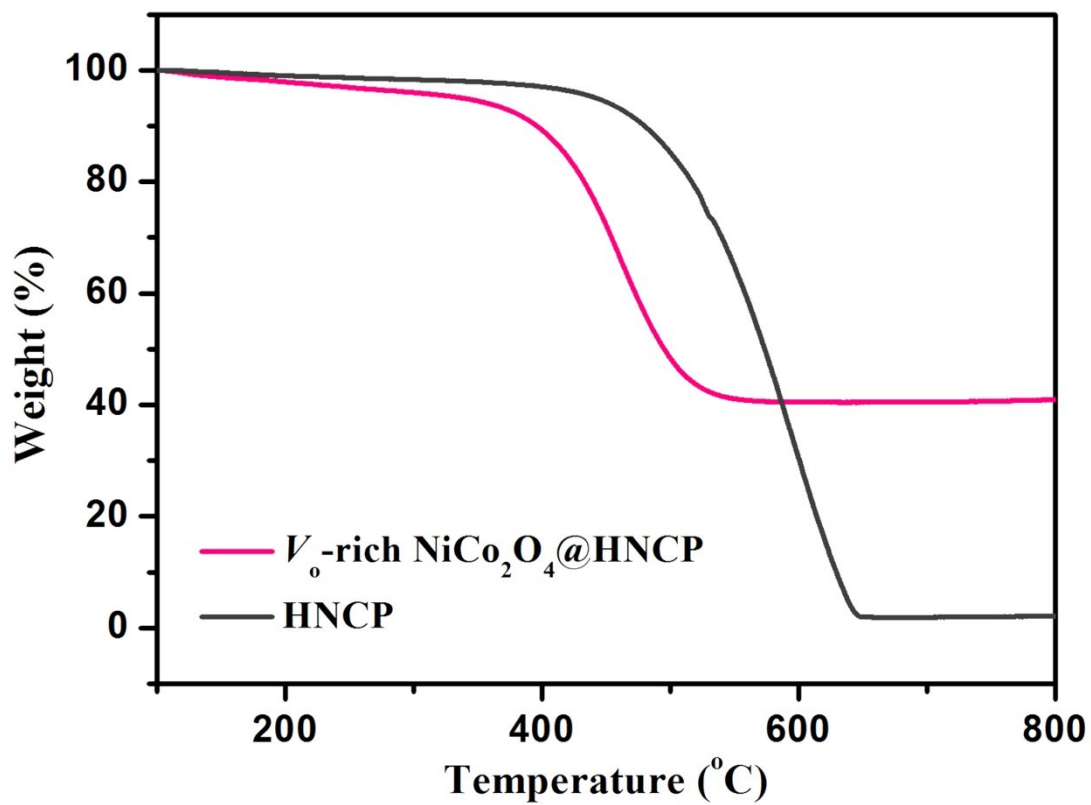

**Figure S7.** Thermogravimetric analysis (TGA) profiles of  $V_o$ -rich  $NiCo_2O_4@HNCP$  and HNCP.

The weight ratio of  $V_o$ -rich  $NiCo_2O_4$  nanosheets in  $V_o$ -rich  $NiCo_2O_4@HNCP$  is determined by TGA to be around 40 wt% (Figure S7).



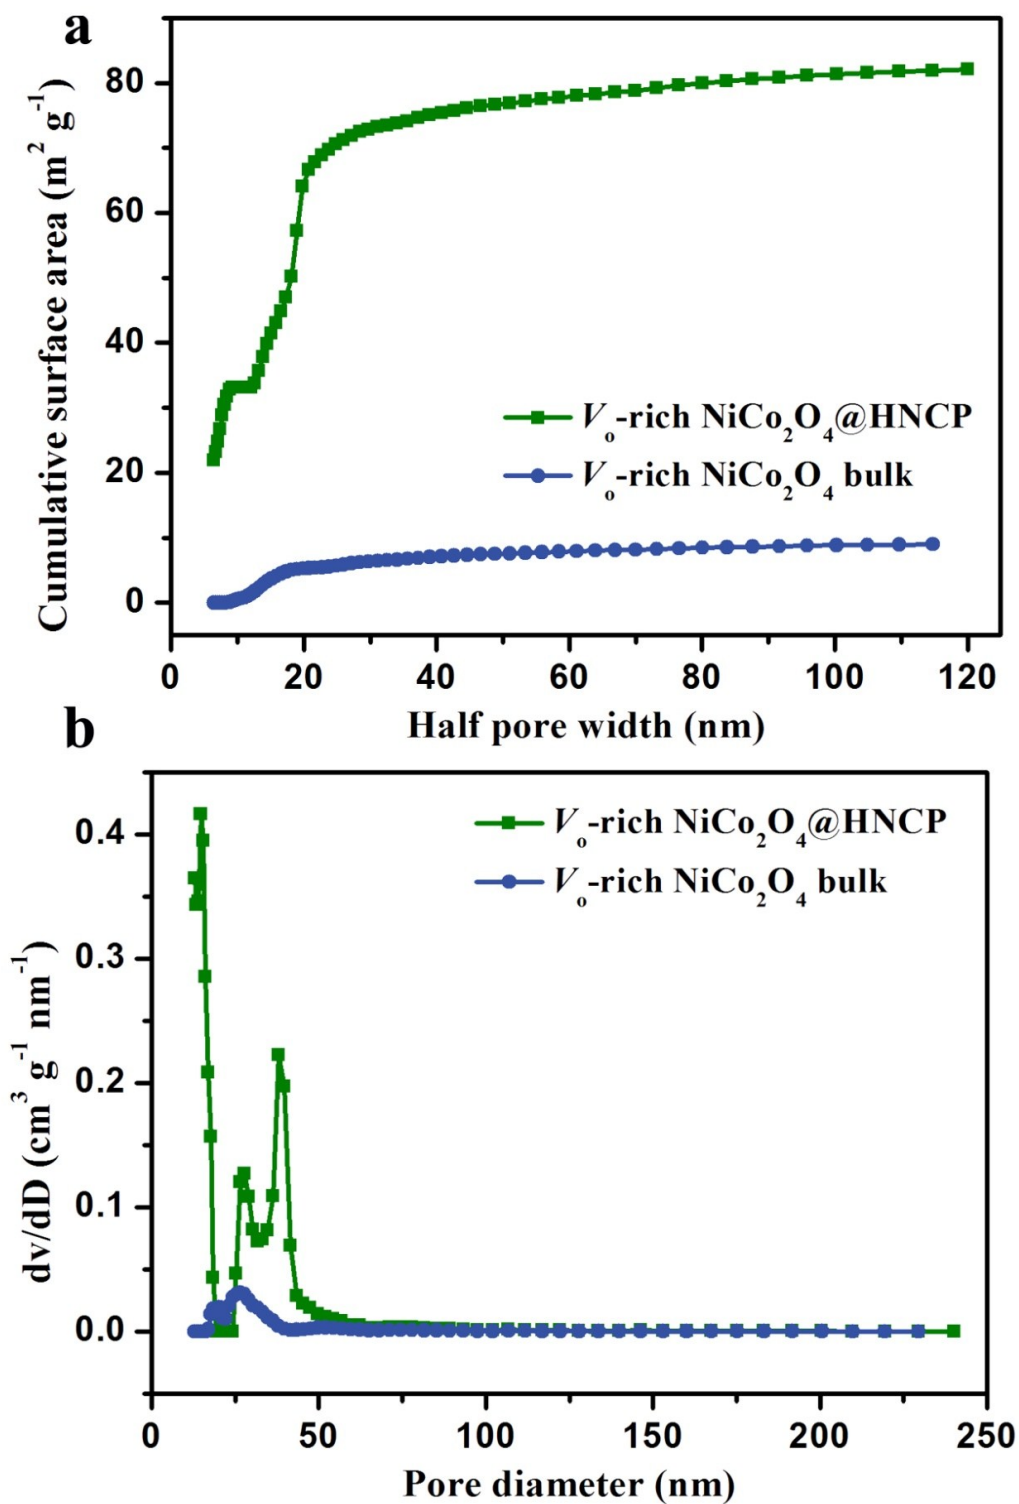

**Figure S8.** a) Cumulative surface areas and b) pore size distributions of  $V_0$ -rich  $NiCo_2O_4@HNCP$  and  $V_0$ -rich  $NiCo_2O_4$  bulk.

The  $V_0$ -rich  $NiCo_2O_4@HNCP$  shows a distinct hysteresis loop as a typical type IV isotherm with abundant mesopores located between 25~65 nm (Figure S8).

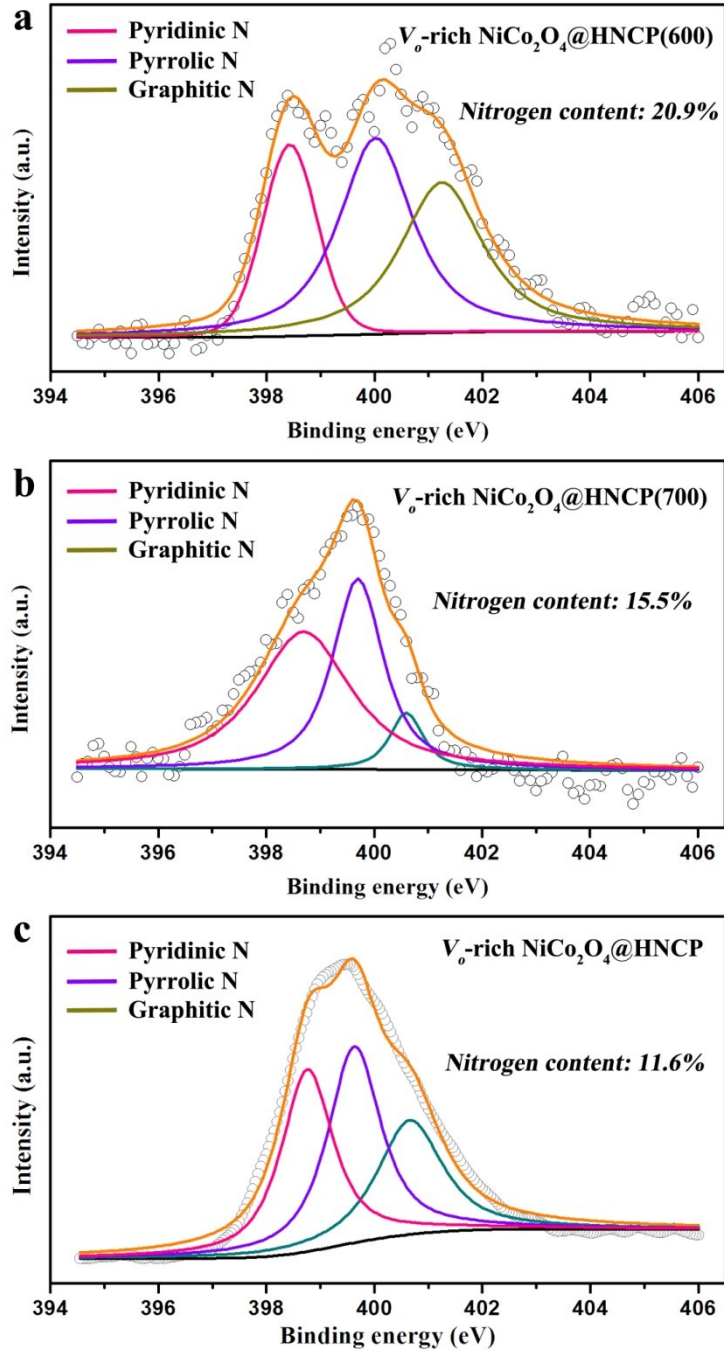

**Figure S9.** N 1s XPS spectra: a)  $V_o$ -rich  $\text{NiCo}_2\text{O}_4@\text{HNCP}(600)$ , b)  $V_o$ -rich  $\text{NiCo}_2\text{O}_4@\text{HNCP}(700)$ , and c)  $V_o$ -rich  $\text{NiCo}_2\text{O}_4@\text{HNCP}$ .

As shown in Figure S9, the nitrogen contents in  $V_o$ -rich  $\text{NiCo}_2\text{O}_4@\text{HNCP}(600)$ ,  $V_o$ -rich  $\text{NiCo}_2\text{O}_4@\text{HNCP}(700)$ , and  $V_o$ -rich  $\text{NiCo}_2\text{O}_4@\text{HNCP}$  are calculated to be 20.9, 15.5, and 11.6 wt%, demonstrating the decreased nitrogen incorporation as the carbonization temperature increases.

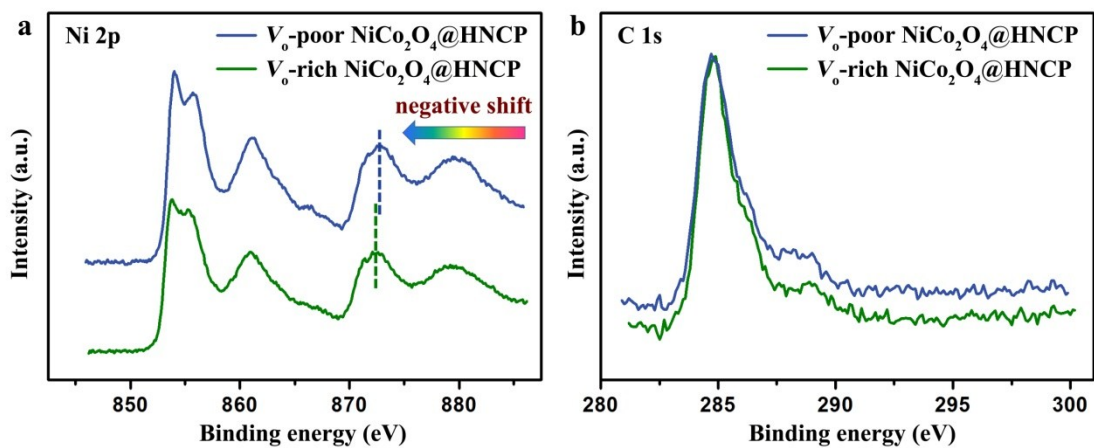

**Figure S10.** X-ray photoelectron spectroscopy (XPS) spectra for  $V_o$ -rich and  $V_o$ -poor  $NiCo_2O_4@HNCP$ : a) Ni 2p, and b) C 1s.

A noticeable peak shift towards low binding energy in Ni 2p XPS spectrum of  $V_o$ -rich  $NiCo_2O_4@HNCP$  is also an evidence of the existence of an oxygen vacancy, indicating the electron transfer from oxygen vacancy to Ni  $d$  band.

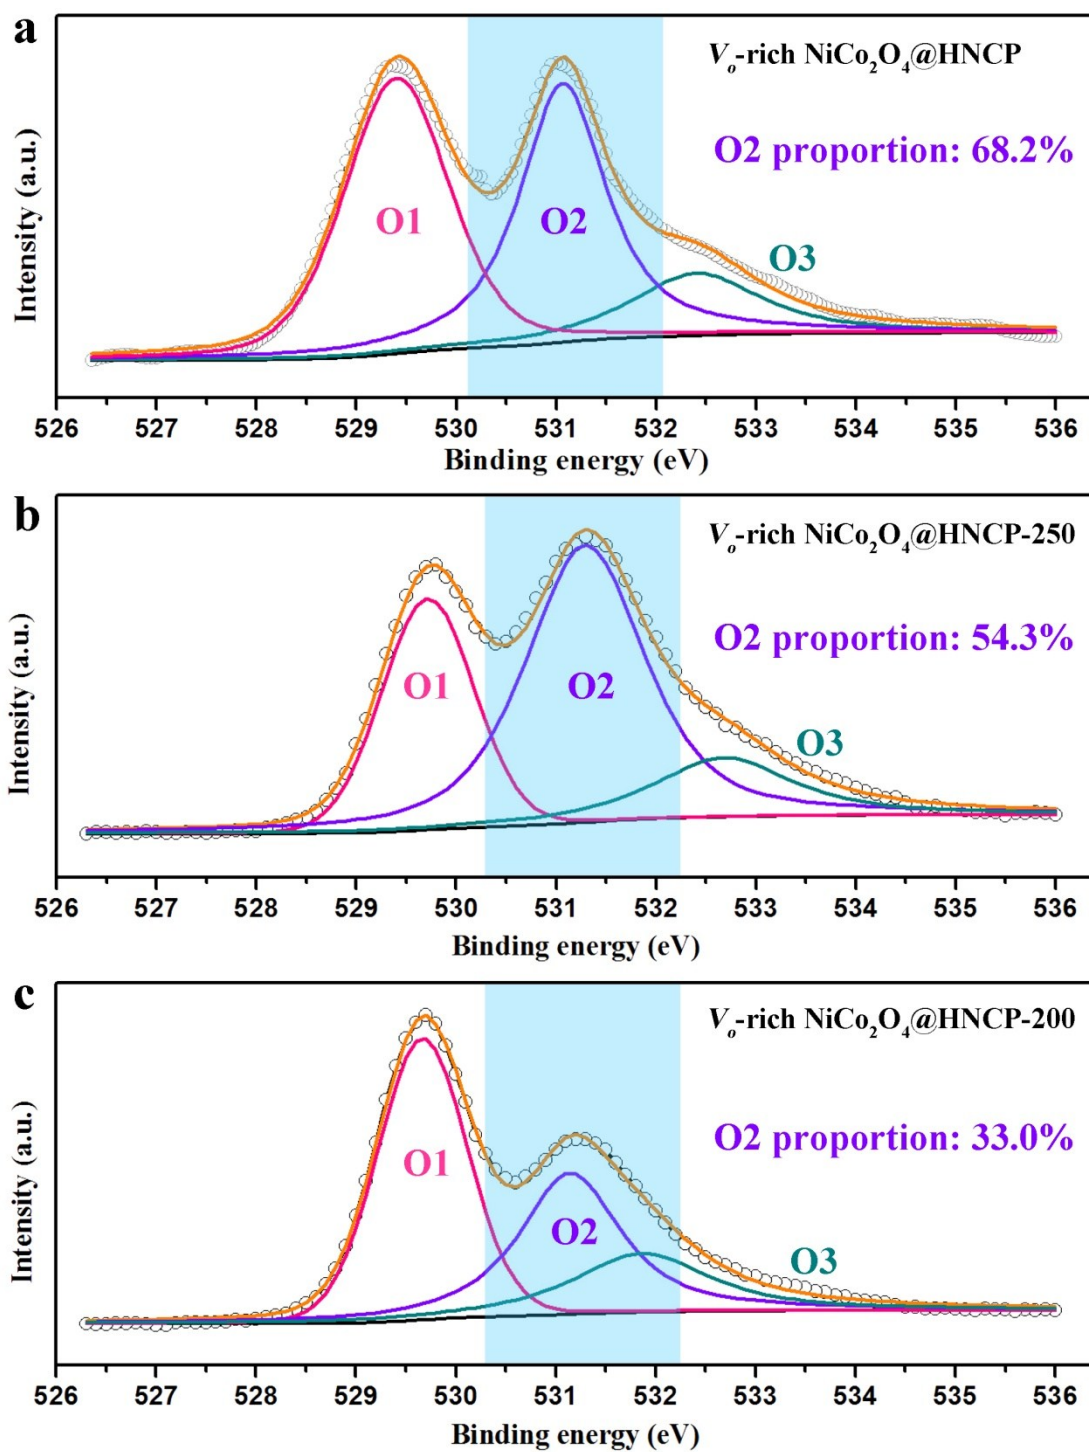

**Figure S11.** O 1s XPS spectra: a)  $V_o$ -rich  $NiCo_2O_4@HNCP$ , b)  $V_o$ -rich  $NiCo_2O_4@HNCP-250$ , and c)  $V_o$ -rich  $NiCo_2O_4@HNCP-200$ .

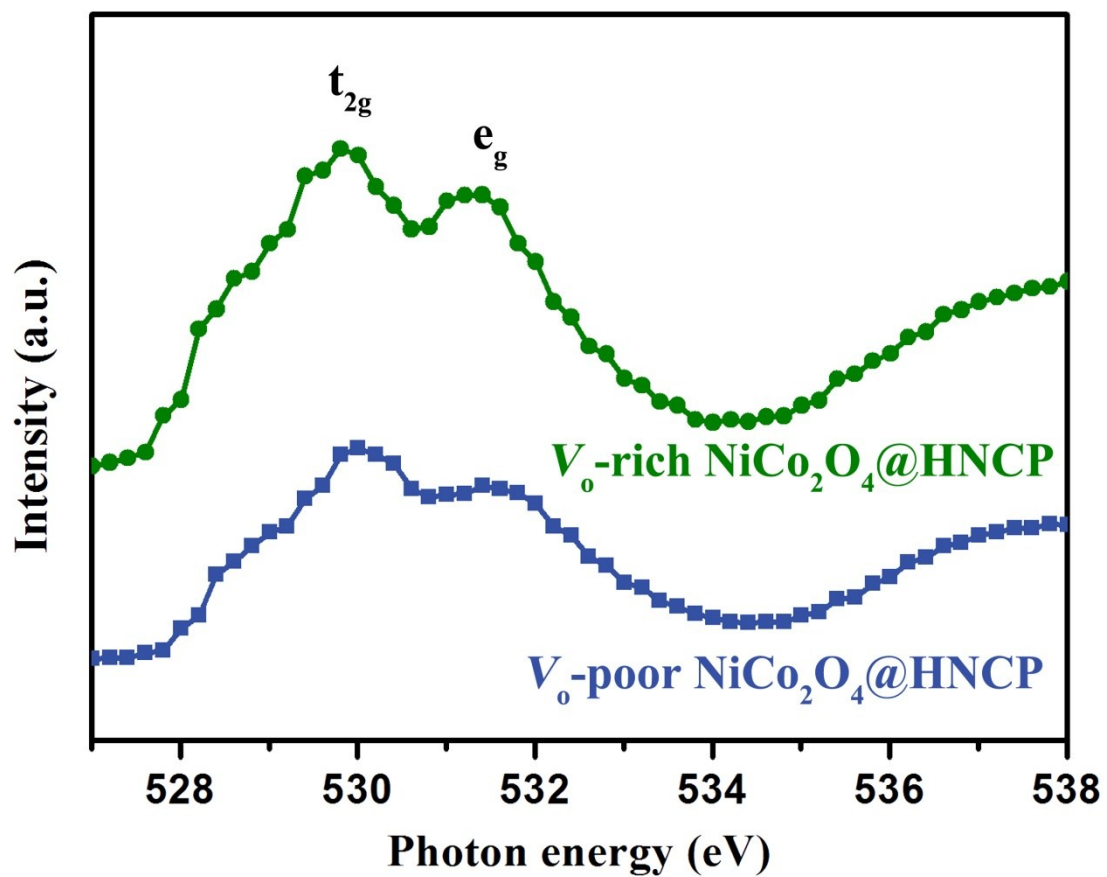

**Figure S12.** The magnification version of  $t_{2g}$  and  $e_g$  O  $K$ -edge for  $V_0$ -rich and  $V_0$ -poor  $\text{NiCo}_2\text{O}_4@ \text{HNCP}$ .

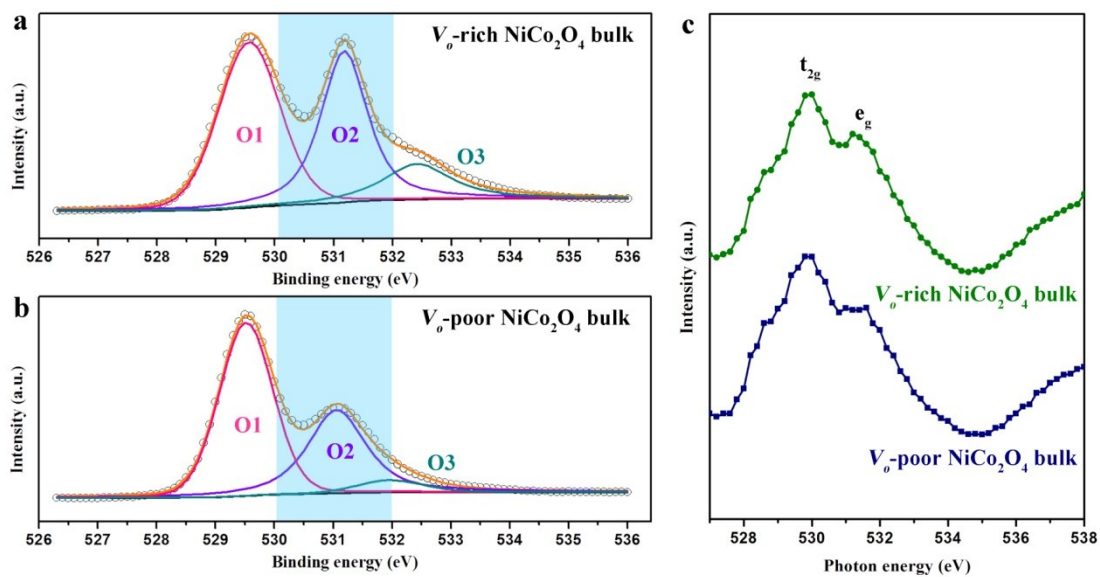

**Figure S13.** O 1s spectra of a)  $V_o$ -rich  $\text{NiCo}_2\text{O}_4$  bulk; and b)  $V_o$ -poor  $\text{NiCo}_2\text{O}_4$  bulk; c) The magnification version of  $t_{2g}$  and  $e_g$  O K-edge for  $V_o$ -rich and  $V_o$ -poor  $\text{NiCo}_2\text{O}_4$  bulks.

Similarly, the results in Figure S13 also give the direct evidence for the generation of oxygen vacancies in the  $\text{NiCo}_2\text{O}_4$  bulk after removing the HNCP template, which demonstrates it is an independent process for the oxygen vacancy incorporation in the  $\text{NiCo}_2\text{O}_4$  crystals.

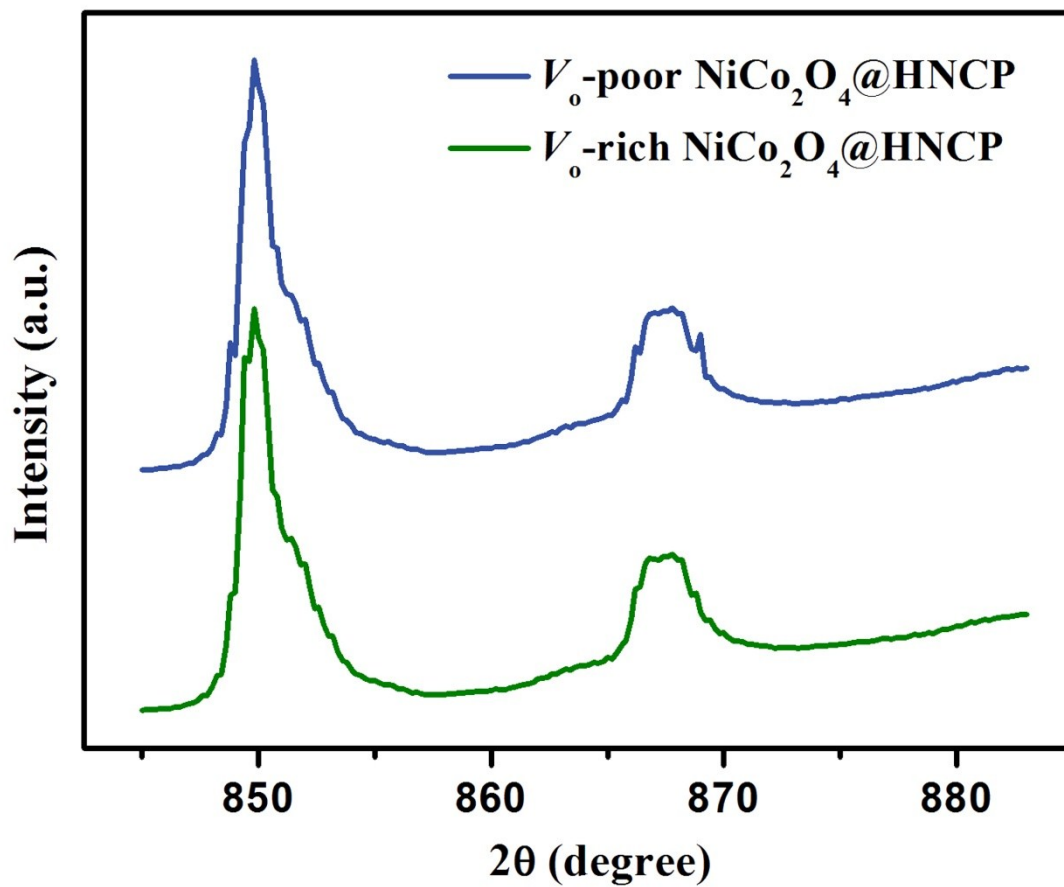

**Figure S14.** Ni *L*-edge XANES spectra of  $V_0$ -rich  $\text{NiCo}_2\text{O}_4@ \text{HNCP}$  and  $V_0$ -poor  $\text{NiCo}_2\text{O}_4@ \text{HNCP}$ .

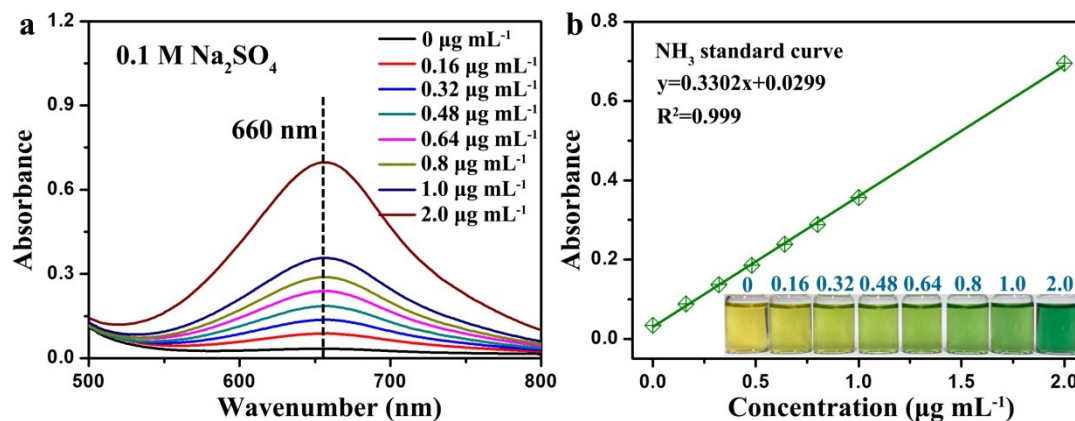

**Figure S15.** a) UV-Vis curves of indophenol assays with known NH<sub>4</sub><sup>+</sup> concentration after incubated for 2 h; b) Calibration curve used for estimating NH<sub>3</sub> amount by NH<sub>4</sub><sup>+</sup> ion concentration.

The absorbance at 660 nm was measured by UV-Vis spectrophotometer (Figure S15a). The fitting curve (Figure S15b) shows good linear relation of absorbance with NH<sub>4</sub><sup>+</sup> ion concentration ( $y = 0.3302x + 0.0299$ ,  $R^2 = 0.999$ ) of three times independent calibration curves. The inset in Figure S15b shows the indophenol blue solutions with different concentrations of NH<sub>4</sub><sup>+</sup> ions.



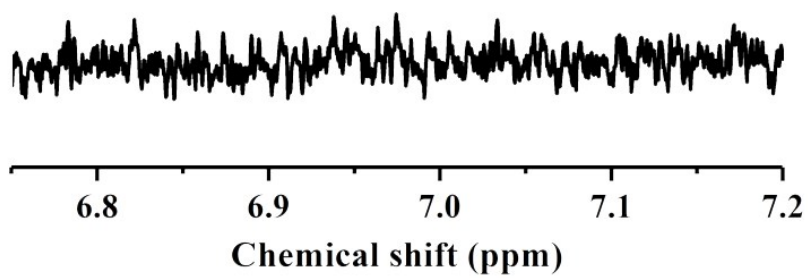

**Figure S16.**  $^1\text{H}$  NMR (400 MHz) spectrum of the electrolyte under open circuit potentials with bubbling of Ar gas for 2 h.

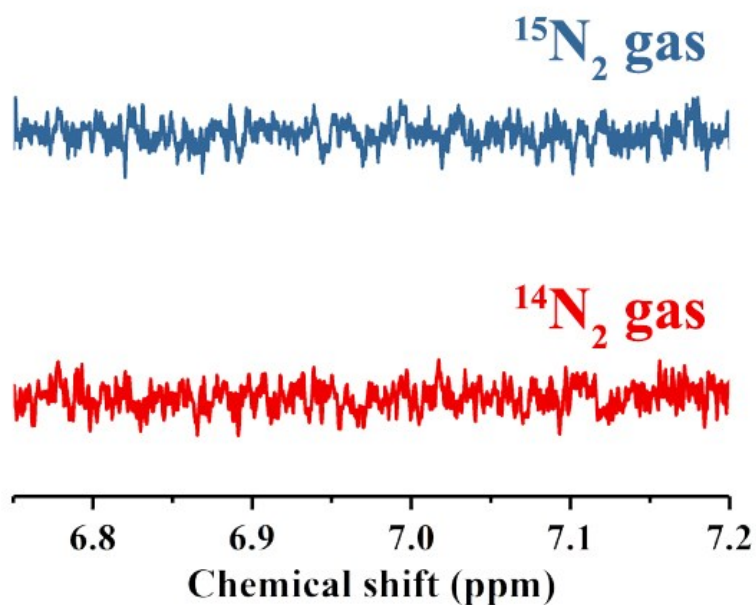

**Figure S17.**  $^1\text{H}$  NMR (400 MHz) spectra of the electrolytes under open circuit potentials: a) bubbling purified  $^{15}\text{N}_2$  for 2 h; b) bubbling  $^{14}\text{N}_2$  gas for 2 h.

To verify the purity of  $^{14}\text{N}_2$  and purified  $^{15}\text{N}_2$  gases, two experiments were conducted under open circuit potentials. As shown in Figure S17, we do not observe obvious signals of  $^{14}\text{N}$  triplets and  $^{15}\text{N}$  doublets, which demonstrate no obvious contamination affects the detection of produced  $\text{NH}_4^+$  in the sealed container.

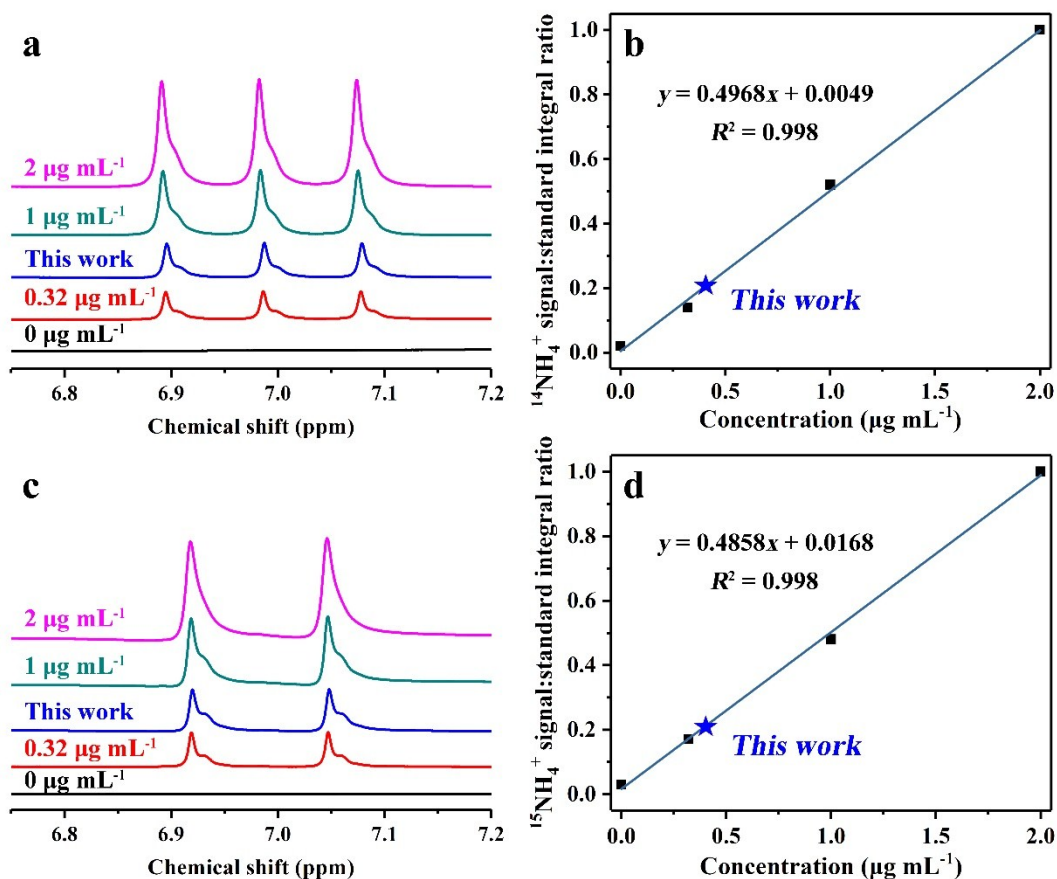

**Figure S18.** a)  $^1\text{H}$  NMR spectra (400 MHz) of various  $^{14}\text{NH}_4^+$  ion concentration and the electrolyte after electrolytic process; b) Integral area ratio against  $^{14}\text{NH}_4^+$  ion concentration; c)  $^1\text{H}$  NMR spectra (400 MHz) of various  $^{15}\text{NH}_4^+$  ion concentration and the electrolyte after electrolytic process; d) Integral area ratio against  $^{15}\text{NH}_4^+$  ion concentration.

As shown in Figure S18, the similar  $\text{NH}_3$  production yields between two analysis methods (NMR and colorimetric method) demonstrate the consistent results in our work. In addition, the similar  $\text{NH}_3$  production yields from both  $^{14}\text{N}_2$  ( $^{14}\text{NH}_3$ :  $4.14 \mu\text{g h}^{-1} \text{cm}^{-2}$ ) and purified  $^{15}\text{N}_2$  ( $^{15}\text{NH}_3$ :  $4.08 \mu\text{g h}^{-1} \text{cm}^{-2}$ ) feed gases also imply the considerable purity of these two gases.

## ***$N_2H_4$ detection***

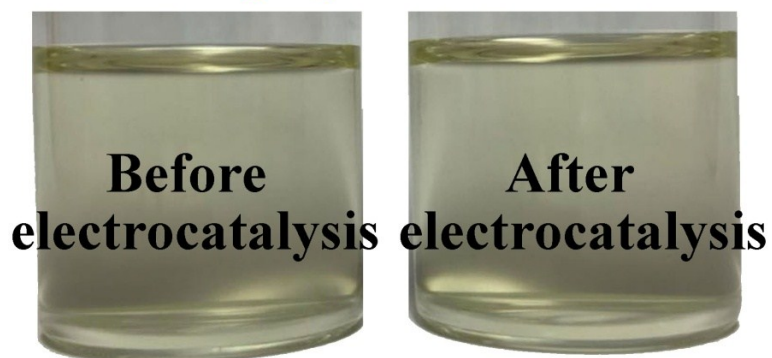

## **$0.1\text{ M Na}_2\text{SO}_4 + \text{N}_2\text{H}_4$ reagent**

**Figure S19.** The photographs for mixed solutions of  $0.1\text{ M Na}_2\text{SO}_4$  and  $\text{N}_2\text{H}_4$  reagent before and after electrocatalysis by using  $V_6$ -rich  $\text{NiCo}_2\text{O}_4@\text{HNCP}$  electrocatalyst.

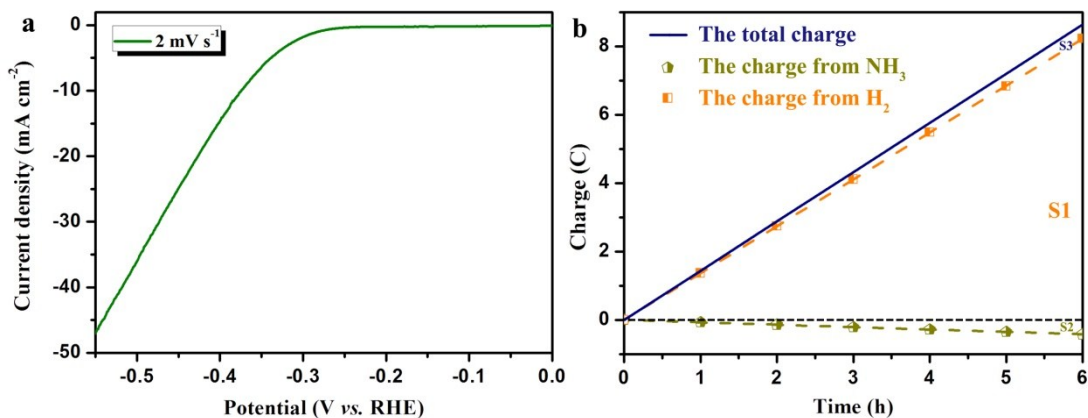

**Figure S20.** a) Polarization curve of  $V_o$ -rich  $\text{NiCo}_2\text{O}_4@\text{HNCP}$  at a scan rate of  $2 \text{ mV s}^{-1}$ . b) The amount of theoretically calculated and experimentally measured charges versus time of electrocatalytic NRR and HER processes for  $V_o$ -rich  $\text{NiCo}_2\text{O}_4@\text{HNCP}$ .

As shown in Figure S20, the Faradaic efficiency for hydrogen evolution reaction can be calculated as about 94.5%, leading to a high total Faradaic efficiency of 99.8% towards the sum of hydrogen evolution reaction and nitrogen reduction reaction. The above results indicate that almost all the electrons are only used for the HER and NRR.

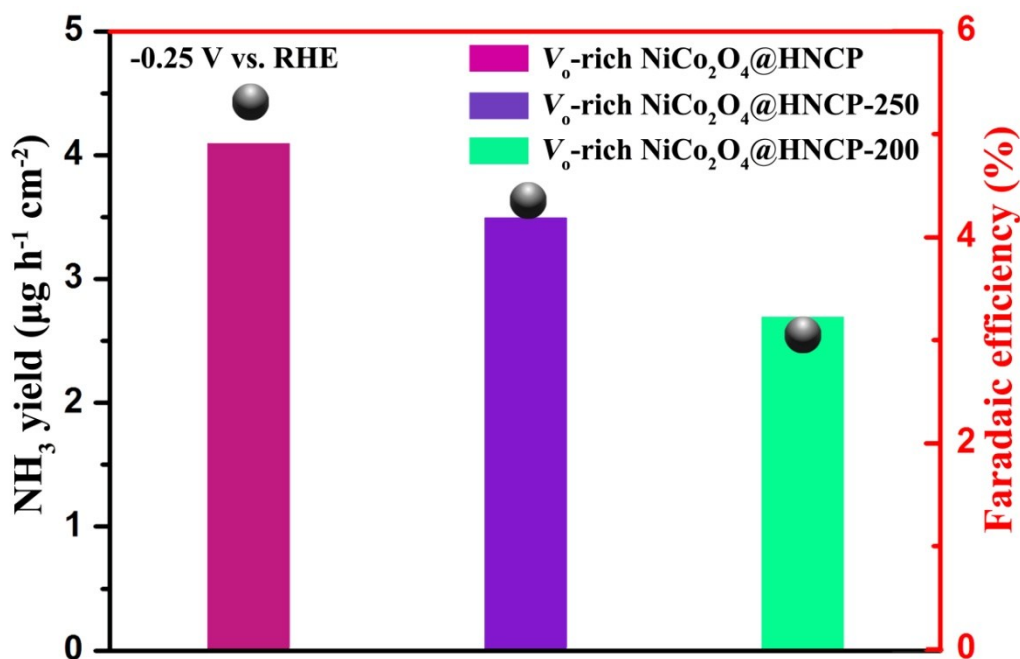

**Figure S21.** Yield of NH<sub>3</sub> (bar graph) and Faradaic efficiency (black point) after the chrono-amperometry test at -0.25 V versus RHE by using V<sub>o</sub>-rich NiCo<sub>2</sub>O<sub>4</sub>@HNCP, V<sub>o</sub>-rich NiCo<sub>2</sub>O<sub>4</sub>@HNCP-250, and V<sub>o</sub>-rich NiCo<sub>2</sub>O<sub>4</sub>@HNCP-200.

As shown in Figure S21, the average NH<sub>3</sub> yields and corresponding Faradaic efficiencies are decreasing gradually as the annealing temperature decreases from 300 to 200 °C with an interval of 50 °C. By combining the XPS results in Figure S11, it can be concluded that their NRR properties are closely related with the oxygen vacancy concentration in the NiCo<sub>2</sub>O<sub>4</sub> nanosheets. In detail, the V<sub>o</sub>-rich NiCo<sub>2</sub>O<sub>4</sub>@HNCP-200 displays the lowest average NH<sub>3</sub> yield (2.7 µg h<sup>-1</sup> cm<sup>-2</sup>) and corresponding Faradaic efficiency (3.1%) at -0.25 V, as compared to those of V<sub>o</sub>-rich NiCo<sub>2</sub>O<sub>4</sub>@HNCP-250 (3.5 µg h<sup>-1</sup> cm<sup>-2</sup>, 4.3%) and V<sub>o</sub>-rich NiCo<sub>2</sub>O<sub>4</sub>@HNCP (4.1 µg h<sup>-1</sup> cm<sup>-2</sup>, 5.3%). These results confirm the positive role of oxygen vacancy for enhanced NRR property.

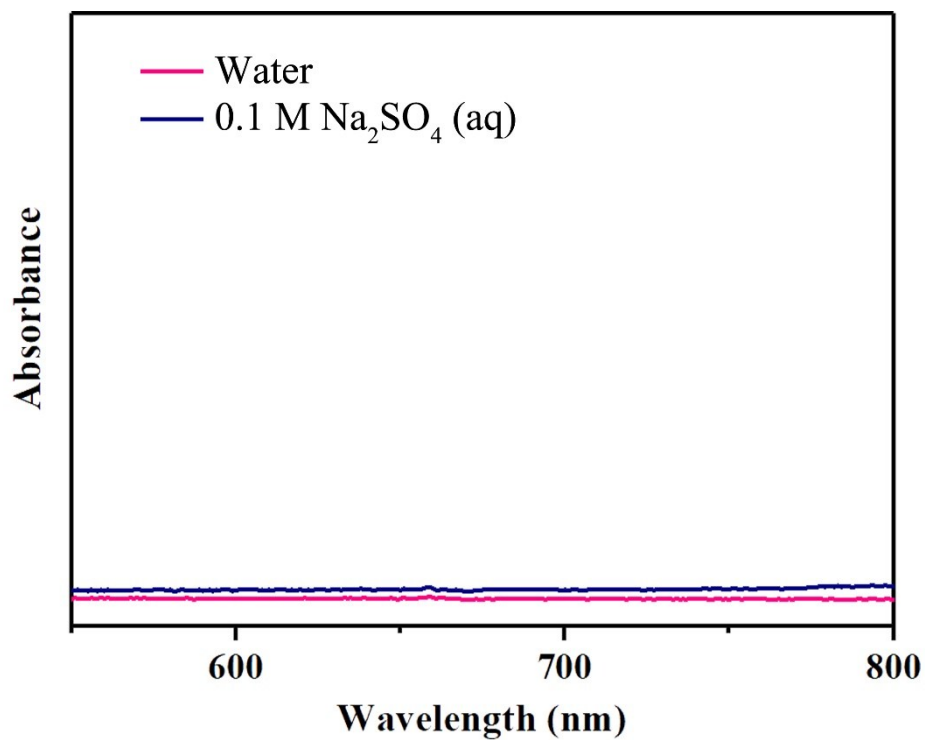

**Figure S22.** UV-Vis absorption spectra of the 0.1 M Na<sub>2</sub>SO<sub>4</sub> and water after incubated for 2 h at room temperature.

As shown in Figure S22, similar UV curves are shown for both water and 0.1 M Na<sub>2</sub>SO<sub>4</sub> electrolyte, indicating that Na<sub>2</sub>SO<sub>4</sub> would not affect the detection of NH<sub>4</sub><sup>+</sup> concentration.

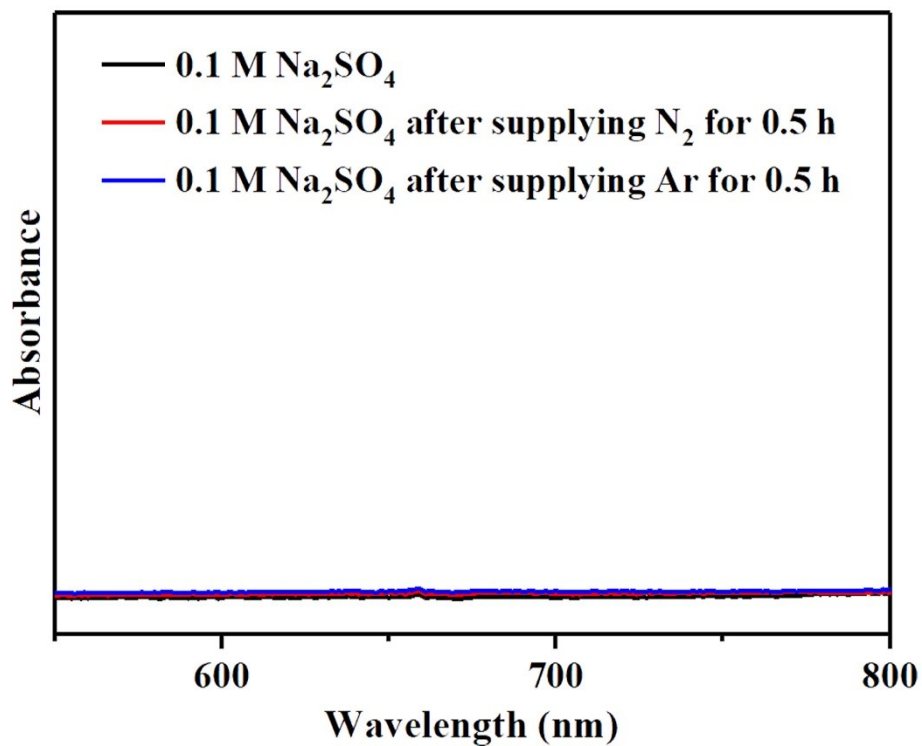

**Figure S23.** UV-Vis absorption spectra of the 0.1 M Na<sub>2</sub>SO<sub>4</sub> electrolyte stained with indophenol indicator before and after continuously supplying N<sub>2</sub> or Ar for 0.5 h at open circuit potentials.

The UV curves in Figure S23 demonstrates that the high purity of N<sub>2</sub> and Ar gases without mixture of NH<sub>3</sub>.



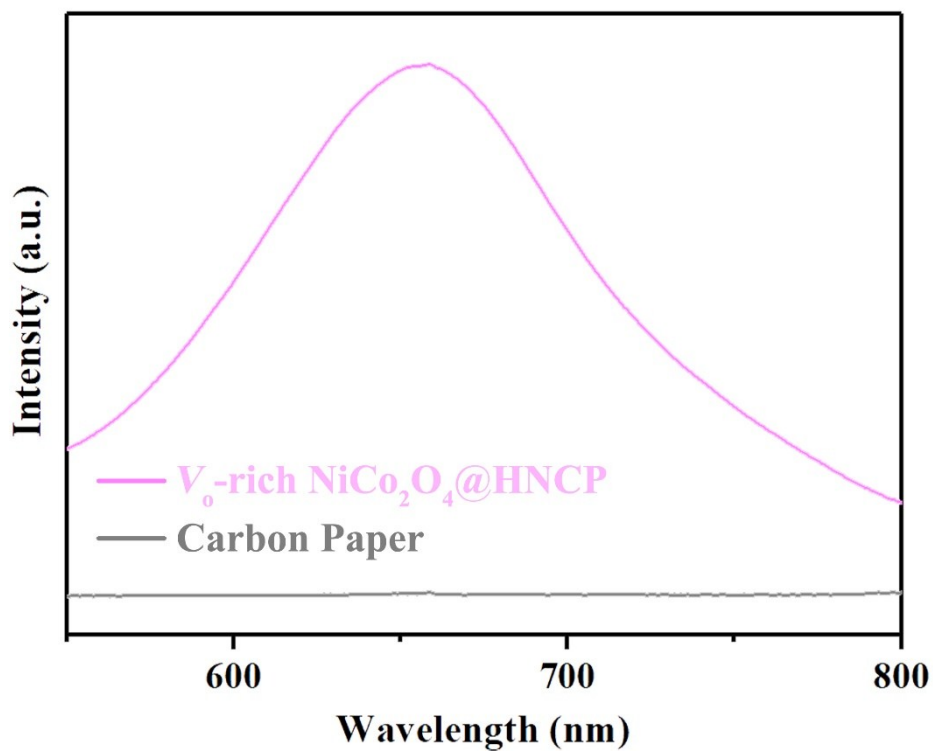

**Figure S24.** UV-Vis absorption spectra of the electrolyte stained with indophenol indicator after chrono-amperometry test at -0.25 V versus RHE by using  $V_0$ -rich  $NiCo_2O_4@HNCP$  and carbon paper, respectively.

As shown in Figure S24, no  $NH_3$  production can be detected in carbon paper electrode, indicating its negligible effect for  $N_2$  reduction under this potential.

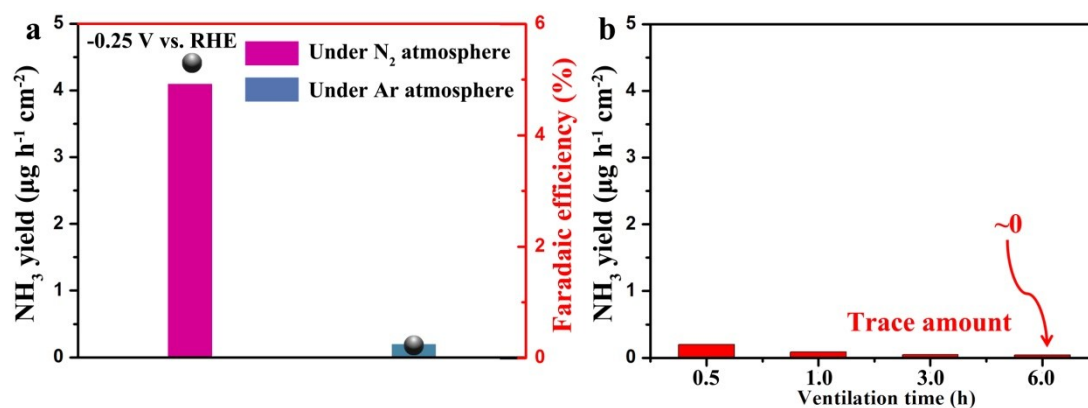

**Figure S25.** a) Yield of NH<sub>3</sub> (bar graph) and Faradaic efficiency (black point) after chrono-amperometry test at -0.25 V versus RHE by using  $V_{\text{o}}$ -rich NiCo<sub>2</sub>O<sub>4</sub>@HNCP under different atmospheres, where the Ar ventilation time is 0.5 h before test. b) Yield of NH<sub>3</sub> by using  $V_{\text{o}}$ -rich NiCo<sub>2</sub>O<sub>4</sub>@HNCP under Ar atmosphere with different Ar ventilation time before test.

Here, we found the dissolved N<sub>2</sub> gas in 0.1 M Na<sub>2</sub>SO<sub>4</sub> electrolyte can be excluded. There are almost no NH<sub>3</sub> production especially the Ar ventilation time reaches about 6 h (Figure S25).

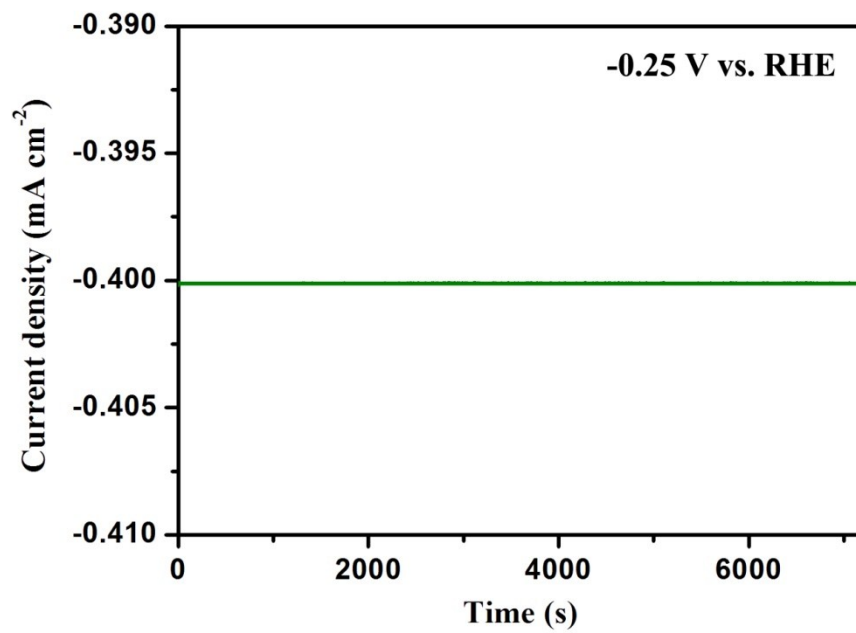

**Figure S26.** Chrono-amperometry curve at potential of -0.25 V vs. RHE by using  $V_{\text{o}}$ -rich  $\text{NiCo}_2\text{O}_4@\text{HNCP}$  catalyst.

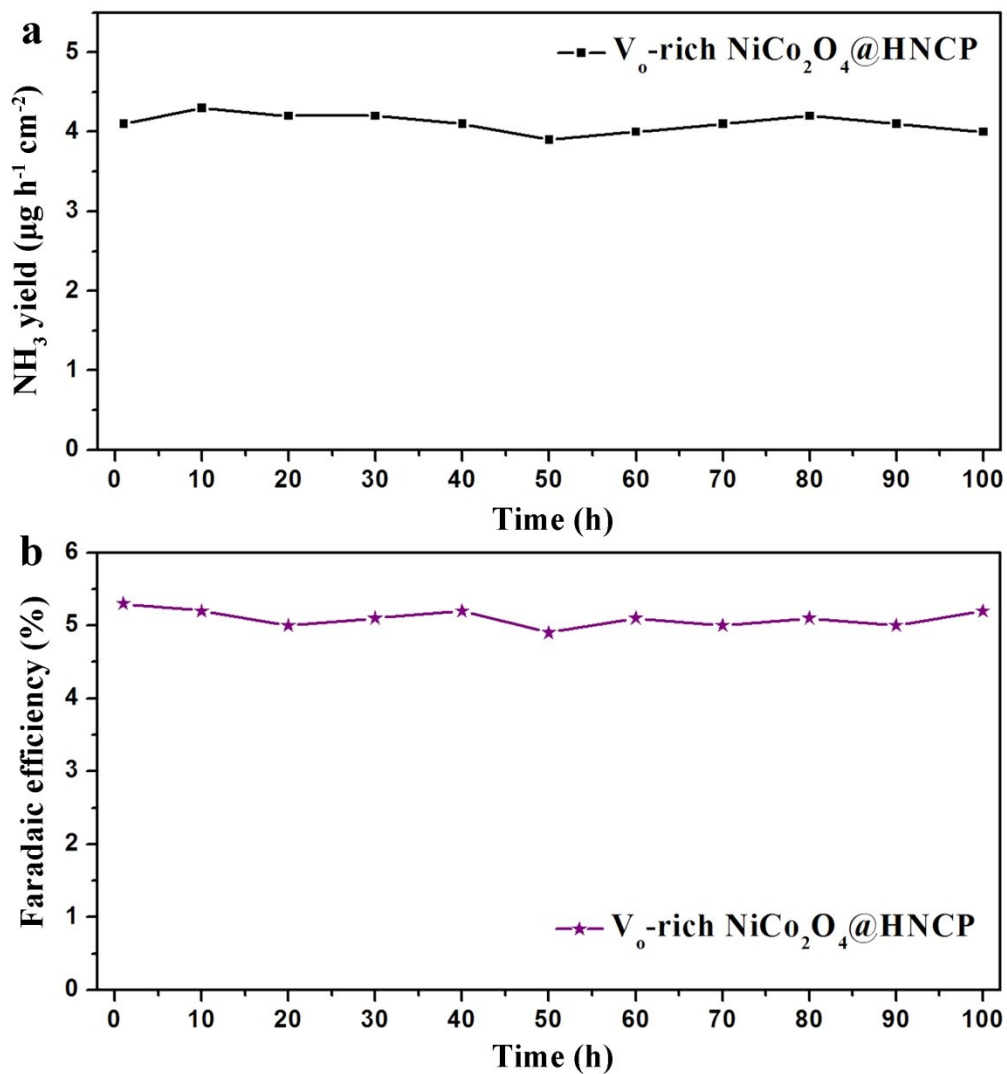

**Figure S27.** Recycling stability of  $V_o$ -rich  $\text{NiCo}_2\text{O}_4@$ HNCP catalyst for 100 h at the potential of -0.25 V.

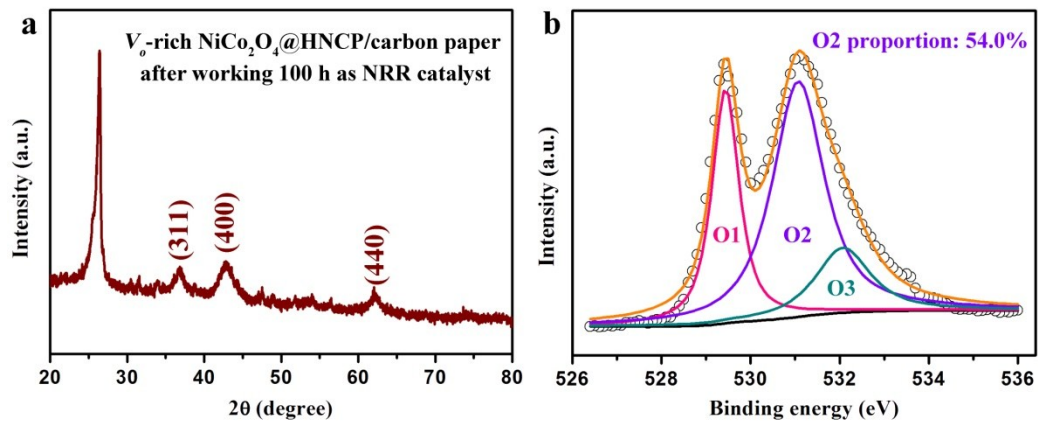

**Figure S28.** a) XRD pattern, and b) O 1s XPS spectrum of  $V_o$ -rich NiCo<sub>2</sub>O<sub>4</sub>@HNCP on carbon paper after working 100 h as NRR catalyst.

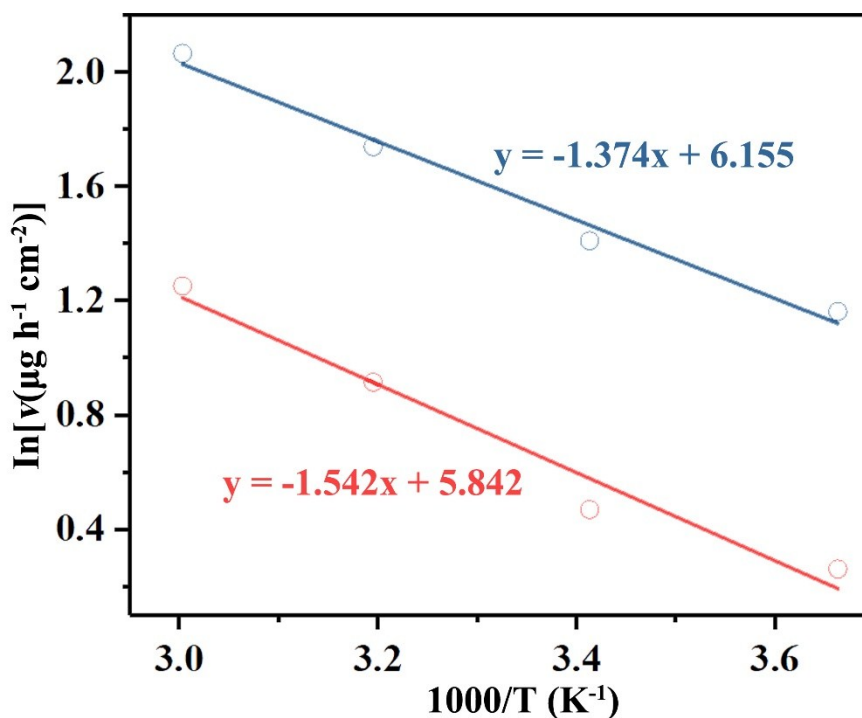

**Figure S29.** Arrhenius plots of the NRR rates ( $v$ ) over  $V_o$ -rich  $\text{NiCo}_2\text{O}_4@\text{HNCP}$  and  $V_o$ -poor  $\text{NiCo}_2\text{O}_4@\text{HNCP}$  catalysts at the temperature from 273 to 333 K.

The fitting curves (blue line) show the linear relation of  $\ln(v)$  with temperature for  $V_o$ -rich  $\text{NiCo}_2\text{O}_4@\text{HNCP}$  ( $y=-1.374x+6.155$ ) and  $V_o$ -poor  $\text{NiCo}_2\text{O}_4@\text{HNCP}$  ( $y=-1.542x+5.842$ ). In accordance with the Arrhenius equations and Arrhenius plots (Figure S29), the apparent activation energy for  $V_o$ -rich  $\text{NiCo}_2\text{O}_4@\text{HNCP}$  is calculated to be  $11.4 \text{ kJ mol}^{-1}$ , which is slightly lower than that of  $12.8 \text{ kJ mol}^{-1}$  for  $V_o$ -poor  $\text{NiCo}_2\text{O}_4@\text{HNCP}$ , indicating the relatively lower energy barrier by using  $V_o$ -rich  $\text{NiCo}_2\text{O}_4@\text{HNCP}$  as electrocatalyst for nitrogen reduction reactions.

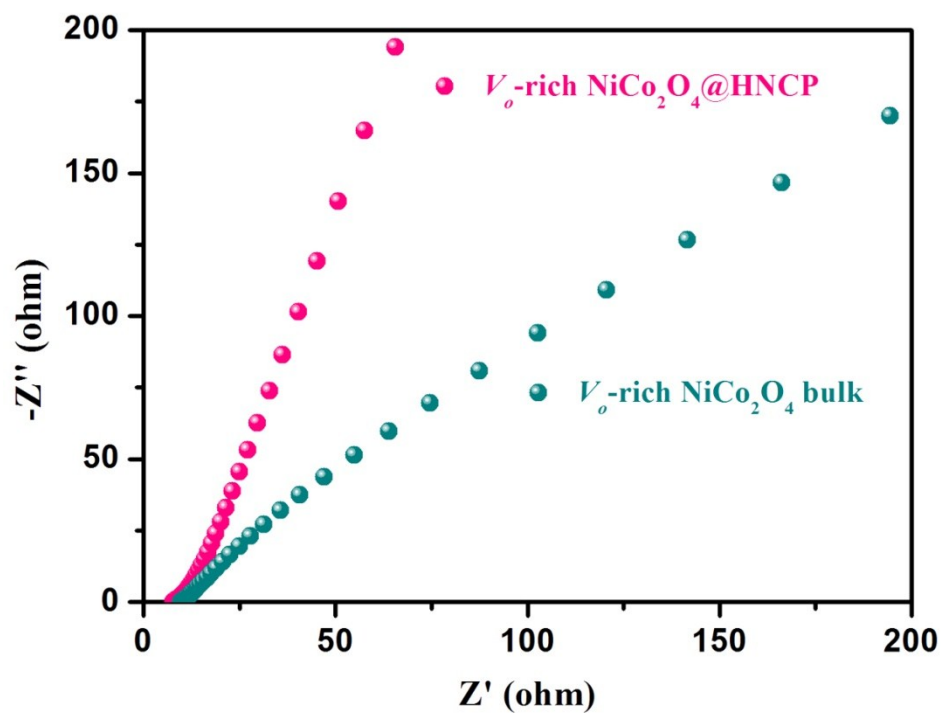

**Figure S30.** Nyquist plots of  $V_o$ -rich  $NiCo_2O_4@HNCP$  and  $V_o$ -rich  $NiCo_2O_4$  bulk.

As shown in Figure S30, the vertical slope of the linear part in the low frequency region indicates the quicker electron transfer and lower diffusion resistance of ions in  $V_o$ -rich  $NiCo_2O_4@HNCP$  as compared with that of  $V_o$ -rich  $NiCo_2O_4$  bulk.

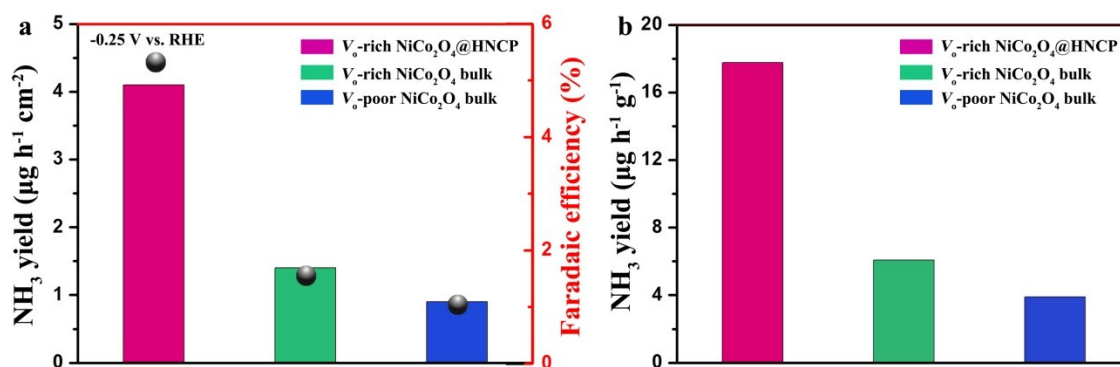

**Figure S31.** Yield of  $\text{NH}_3$  (bar graph) and Faradaic efficiency (black point) after chrono-amperometry test at -0.25 V versus RHE by using  $V_o$ -rich  $\text{NiCo}_2\text{O}_4$ @HNCP,  $V_o$ -rich  $\text{NiCo}_2\text{O}_4$  bulk,  $V_o$ -poor  $\text{NiCo}_2\text{O}_4$  bulk catalysts.

After comparing with the  $V_o$ -rich  $\text{NiCo}_2\text{O}_4$  bulk (1.4  $\mu\text{g h}^{-1} \text{cm}^{-2}$ /6.1  $\mu\text{g h}^{-1} \text{mg}^{-1}$ , 1.6% at -0.25 V) in Figure S31, it was proved that the hollow nitrogen-doped carbon polyhedron template in  $V_o$ -rich  $\text{NiCo}_2\text{O}_4$ @HNCP is extremely vital for its enhanced NRR performance, due to the increased specific surface area (Figure 2d), and well-formed interface between HNCP and  $V_o$ -rich  $\text{NiCo}_2\text{O}_4$  nanosheets for charge accumulation/transfer. Meanwhile, the  $V_o$ -rich  $\text{NiCo}_2\text{O}_4$  bulk also possesses an enhanced NRR performance as compared with that of  $V_o$ -poor  $\text{NiCo}_2\text{O}_4$  bulk, which provides the direct evidence for the positive role of oxygen vacancy in  $V_o$ -rich  $\text{NiCo}_2\text{O}_4$  nanosheets.



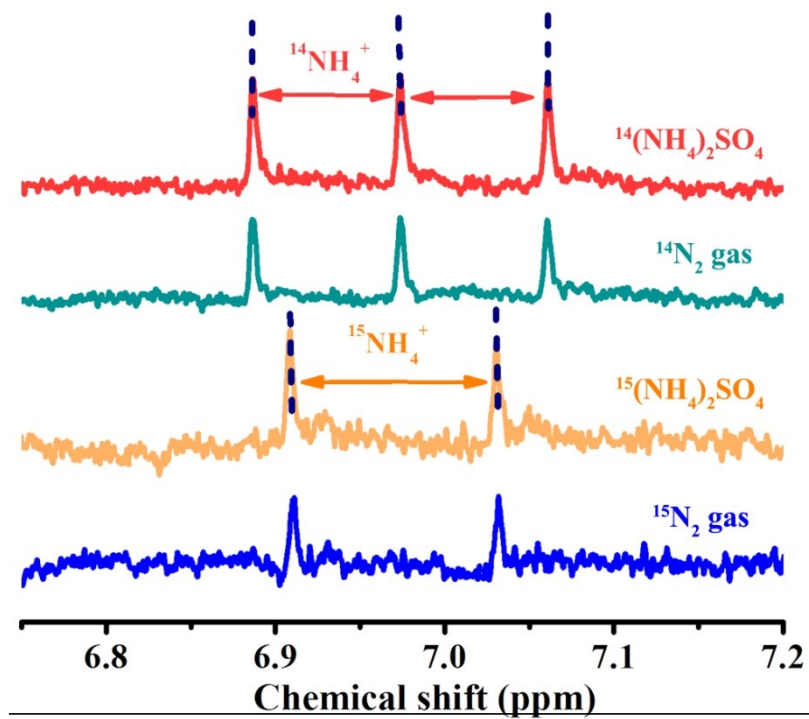

**Figure S32.**  $^1\text{H}$  NMR spectra (600 MHz) of  $^{15}\text{NH}_4^+$  and  $^{14}\text{NH}_4^+$  produced from the NRR reaction using  $^{15}\text{N}_2$  and  $^{14}\text{N}_2$  as the feeding gas.

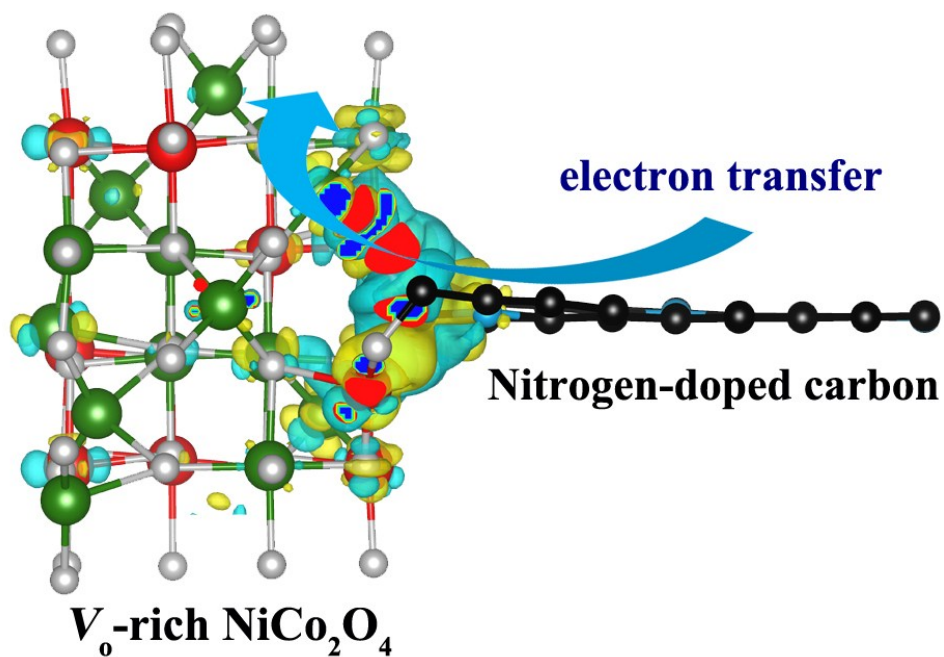

**Figure S33.** Charge density distribution of  $V_0$ -rich  $NiCo_2O_4@HNCP$  around the interface and oxygen vacancy with efficient electron transfer from nitrogen-doped carbon to  $V_0$ -rich  $NiCo_2O_4$ .

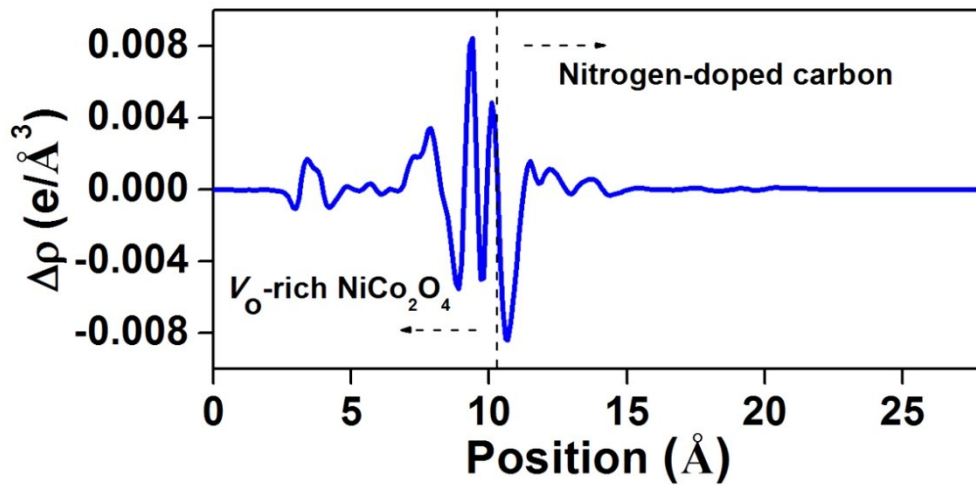

**Figure S34.** Bader charge analysis of average atoms near the interface of nitrogen-doped carbon and  $V_o$ -rich  $\text{NiCo}_2\text{O}_4$ .

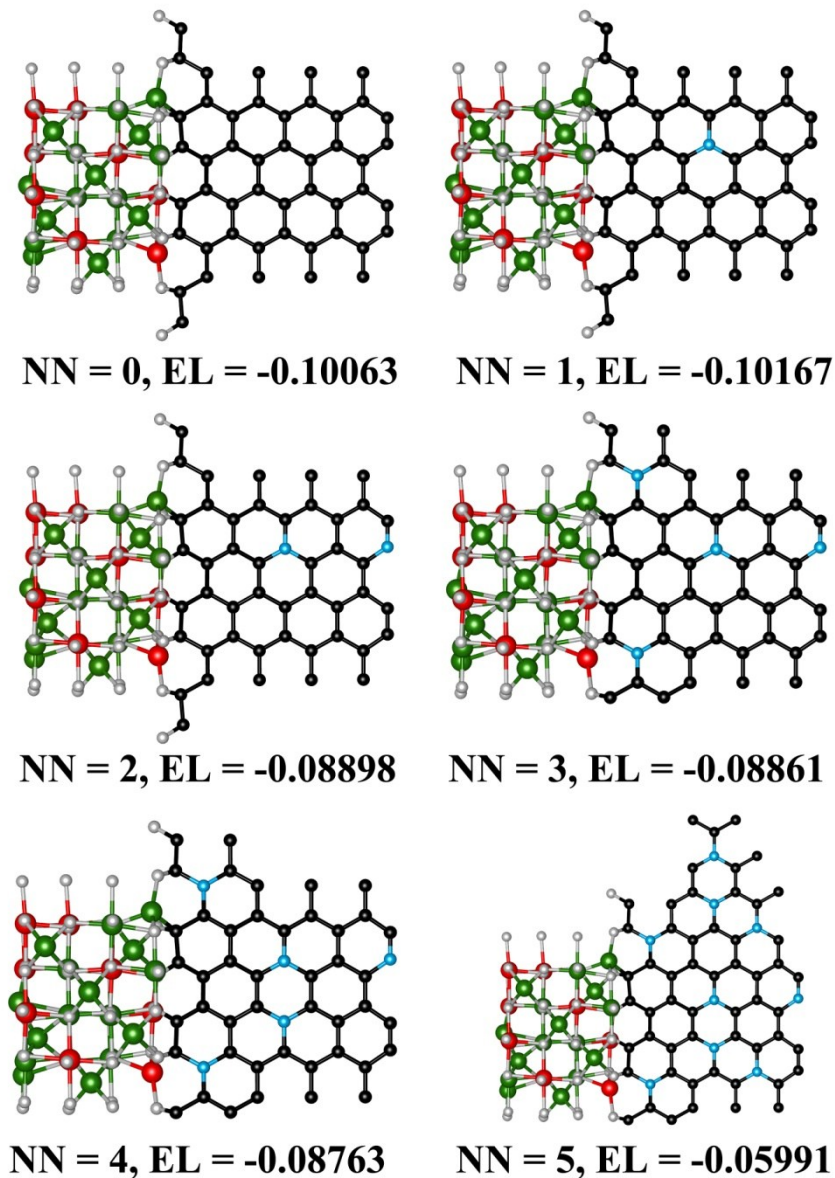

**Figure S35.** Atomic structures with different nitrogen doping amount. (Here, “NN” and “EL” are the abbreviations of the number of nitrogen atoms in the nitrogen-doped carbon structure and the electron loss per atom.)

From the perspective of theoretical calculation results (Figure S35), the non-doped carbon template shows a more positive EL value than that of nitrogen doped carbon (NN=1), which demonstrates that slightly doped nitrogen is beneficial for the electron transfer from carbon template to the  $V_o$ -rich  $\text{NiCo}_2\text{O}_4$  nanosheets. However, this electron transfer is gradually confined by increasing the NN from 1 to 5, which means a relatively low nitrogen amount is beneficial for the electron transfer.

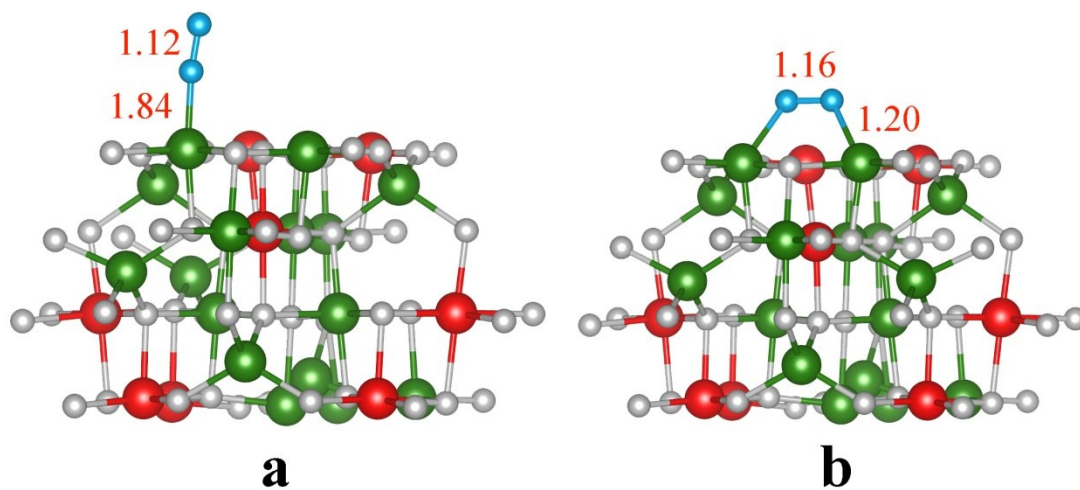

**Figure S36.** Optimized structures of  $\text{N}_2$  adsorption on the surface of a)  $V_o$ -poor  $\text{NiCo}_2\text{O}_4$  and b)  $V_o$ -rich  $\text{NiCo}_2\text{O}_4$  for end-on and side-on configurations, respectively. The key bond lengths ( $\text{\AA}$ ) are also given.

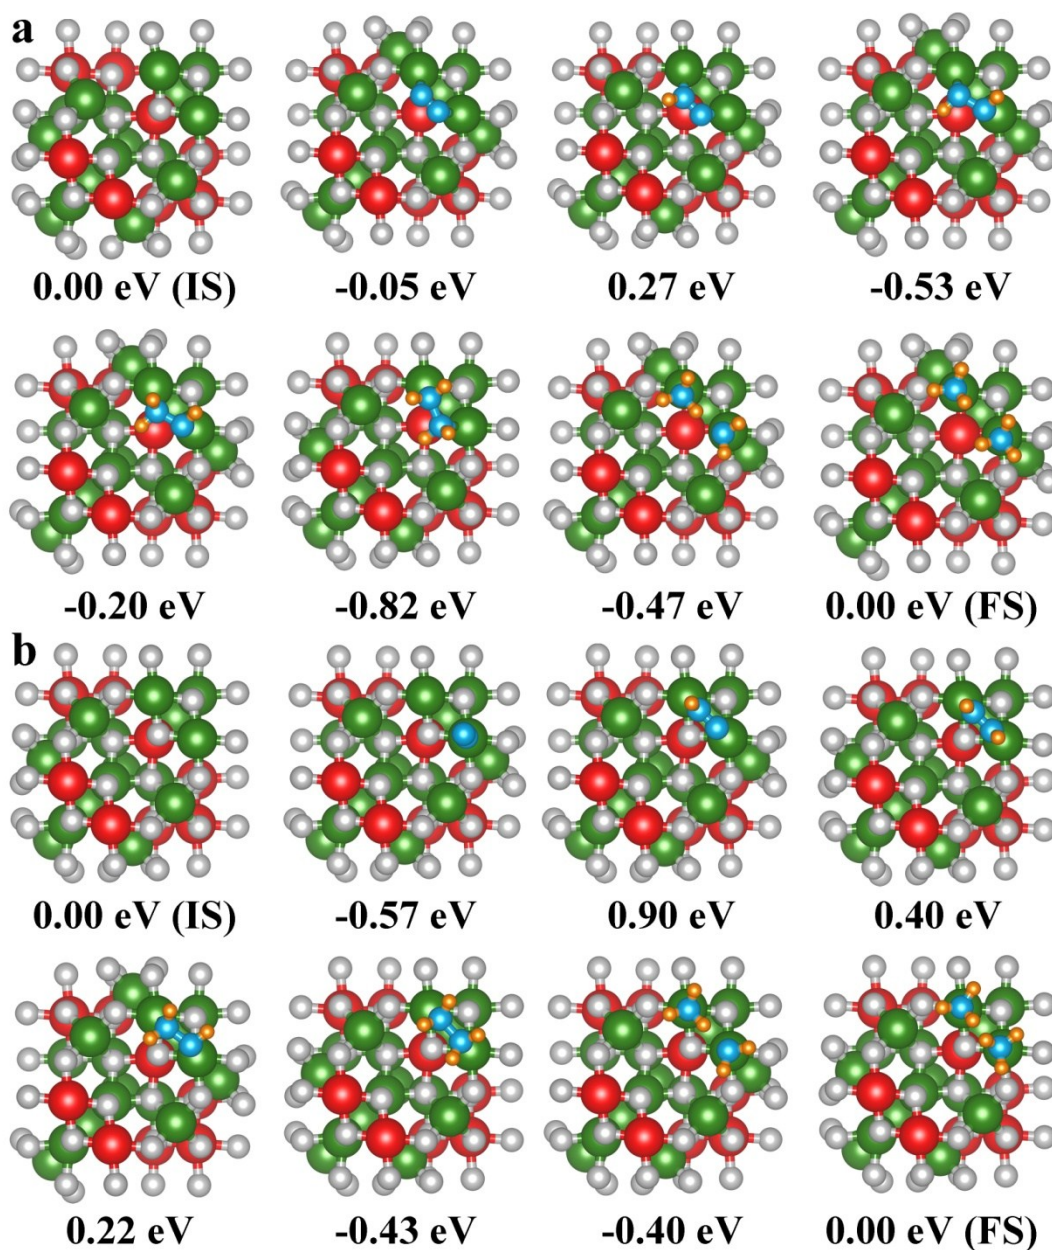

**Figure S37.**  $\text{N}_2$  reduction reaction process on a)  $V_0$ -rich  $\text{NiCo}_2\text{O}_4$  and b)  $V_0$ -poor  $\text{NiCo}_2\text{O}_4$ . IS and FS indicate initial state and final state correspondingly. Red, green, grey, light blue, and orange are nickel, cobalt, oxygen, nitrogen, and hydrogen, respectively.



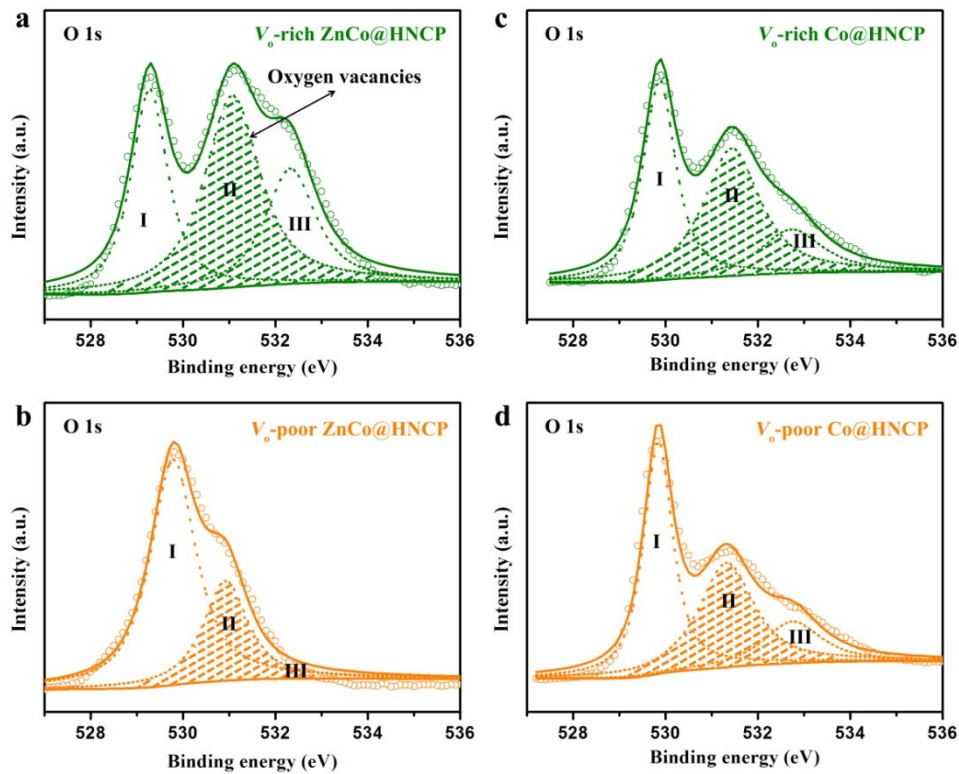

**Figure S38.** XPS O 1s spectra of a)  $V_o$ -rich ZnCo@HNCP, b)  $V_o$ -poor ZnCo@HNCP, c)  $V_o$ -rich Co@HNCP, and d)  $V_o$ -poor ZnCo@HNCP.

The peaks at 529.4, 531.1 and 532.3 eV are associated with lattice oxygen, oxygen vacancies or defects with lower oxygen coordination, and surface adsorbed water molecules, respectively. Obviously, the areas of peak II of  $V_o$ -rich ZnCo@HNCP and  $V_o$ -rich Co@HNCP are much higher than that corresponding  $V_o$ -poor ones, indicating that a larger number of oxygen vacancies are present on the surface of  $V_o$ -rich ZnCo@HNCP and  $V_o$ -rich Co@HNCP.

**Table S1.** The analysis reports for the compositions of different kinds of gases  
(provided by WUHAN NEWRADAR SPECIAL GAS CO., LTD.).

| <b>Products</b>                    |                         | <b>Purity (%)</b> |
|------------------------------------|-------------------------|-------------------|
| <b>High-purity Ar</b>              |                         | $\geq 99.999$     |
| <b>Impurity content<br/>(ppm)</b>  | N <sub>2</sub>          | $\leq 5$          |
|                                    | O <sub>2</sub>          | $\leq 2$          |
|                                    | H <sub>2</sub>          | $\leq 1$          |
|                                    | CO                      | -                 |
|                                    | CO <sub>2</sub>         | -                 |
|                                    | H <sub>2</sub> O        | $\leq 4$          |
|                                    | Total hydrocarbon (THC) | $\leq 2$          |
| <b>N<sub>2</sub></b>               |                         | $\geq 99.99$      |
| <b>Impurity content<br/>(ppmv)</b> | O <sub>2</sub>          | $\leq 3$          |
|                                    | H <sub>2</sub>          | $\leq 1$          |
|                                    | H <sub>2</sub> O        | $\leq 3$          |
|                                    | CO <sub>2</sub>         | $\leq 3$          |
|                                    | CO                      |                   |
|                                    | CH <sub>4</sub>         |                   |
| <b>High-purity N<sub>2</sub></b>   |                         | $\geq 99.999$     |
| <b>Impurity content<br/>(ppm)</b>  | O <sub>2</sub>          | $\leq 3$          |
|                                    | H <sub>2</sub>          | $\leq 1$          |
|                                    | H <sub>2</sub> O        | $\leq 5$          |
|                                    | CO <sub>2</sub>         | $\leq 3$          |
|                                    | CO                      |                   |
|                                    | CH <sub>4</sub>         |                   |



**Table S2.** Summary of recent reports of catalysts for N<sub>2</sub> conversion to NH<sub>3</sub>.

| Process                                                                                                                                      | System/Catalyst                                                                  | Conditions                                            | yield                                                                                               | FE                                                   | Reference                                              |
|----------------------------------------------------------------------------------------------------------------------------------------------|----------------------------------------------------------------------------------|-------------------------------------------------------|-----------------------------------------------------------------------------------------------------|------------------------------------------------------|--------------------------------------------------------|
| Photocatalysis                                                                                                                               | BiOBr, H <sub>2</sub> O<br>(sacrificial agent)                                   | 300 W Xenon, $\lambda$<br>> 420 nm                    | 104.2<br>$\mu\text{mol h}^{-1}$                                                                     | ----                                                 | <i>J. Am. Chem. Soc.</i> <b>2015</b> ,<br>137, 6393.   |
|                                                                                                                                              | Diamond, KI<br>(sacrificial agent)                                               | $\lambda$ > 190 nm                                    | 0.8 ppm<br>(24 h)                                                                                   | ----                                                 | <i>Nat. Mater.</i><br><b>2013</b> , 12,<br>836.        |
|                                                                                                                                              | Graphitic-C <sub>3</sub> N <sub>4</sub> ,<br>methanol, H <sub>2</sub> O          | $\lambda$ > 420 nm                                    | 1.24<br>$\text{mmol h}^{-1}$<br>$\text{g}^{-1}$                                                     | ----                                                 | <i>J. Mater. Chem. A</i><br><b>2015</b> , 3,<br>23435. |
|                                                                                                                                              | FeMoS chalcogels,<br>pyridinium<br>hydrochloride and<br>sodium ascorbate<br>(aq) | 150 W Xenon<br>lamp                                   | $\sim$ 0.11<br>$\mu\text{mol}$<br>$\mu\text{mol}_{\text{cataly}}$<br>$\text{st}^{-1} \text{h}^{-1}$ | ----                                                 | <i>J. Am. Chem. Soc.</i> <b>2015</b> ,<br>137, 2030.   |
|                                                                                                                                              | BiO quantum dots,<br>H <sub>2</sub> O                                            | 500 W Xenon<br>lamp                                   | 1226<br>$\text{mmol g}^{-1}$<br>$\text{h}^{-1}$                                                     | ----                                                 | <i>J. Mater. Chem. A</i><br><b>2017</b> , 5, 201.      |
|                                                                                                                                              | Carbon-WO <sub>3</sub> ·H <sub>2</sub> O,<br>H <sub>2</sub> O                    | 500 W Xenon<br>lamp                                   | 205<br>$\text{mmol g}^{-1}$<br>$\text{h}^{-1}$                                                      | ----                                                 | <i>Chem. Eur. J.</i> <b>2016</b> , 22,<br>13819.       |
|                                                                                                                                              | Ni <sub>2</sub> P/Cd <sub>0.5</sub> Zn <sub>0.5</sub> S,<br>H <sub>2</sub> O     | 300 W Xenon<br>lamp, $\lambda$ > 420<br>nm            | 101.5<br>$\mu\text{mol h}^{-1}$                                                                     | ----                                                 | <i>Chem. Eng. J.</i> <b>2017</b> , 307,<br>311.        |
|                                                                                                                                              | TiO <sub>2</sub> , H <sub>2</sub> O (200<br>mL)                                  | High-pressure<br>Hg lamp, $\lambda$ ><br>280 nm       | 35 $\mu\text{M}$<br>(48 h)                                                                          | ----                                                 | <i>J. Am. Chem. Soc.</i> <b>2017</b> ,<br>139, 10929.  |
|                                                                                                                                              | Electrocatalysis                                                                 | Au-TiO <sub>2</sub> sub-<br>nanocluster, 0.1 M<br>HCl | Room<br>temperature and<br>atmospheric<br>pressure                                                  | 21.4 $\mu\text{g}$<br>$\text{h}^{-1} \text{mg}^{-1}$ | 8.11%                                                  |
| Au nanorods, 0.1 M<br>KOH                                                                                                                    |                                                                                  | Room<br>temperature and<br>atmospheric<br>pressure    | 1.648 $\mu\text{g}$<br>$\text{h}^{-1} \text{cm}^{-2}$                                               | 3.88%                                                | <i>Adv. Mater.</i><br><b>2017</b> , 29,<br>1604799.    |
| Li <sup>+</sup> -incorporation<br>poly(N-ethyl-<br>benzene-1,2,4,5-<br>tetracarboxylic<br>diimide), 0.5 M<br>Li <sub>2</sub> SO <sub>4</sub> |                                                                                  | Room<br>temperature and<br>atmospheric<br>pressure    | 1.58 $\mu\text{g}$<br>$\text{h}^{-1} \text{cm}^{-2}$                                                | 2.85%                                                | <i>J. Am. Chem. Soc.</i> <b>2017</b> ,<br>139, 9771.   |

|                         |                                                                                                          |                                           |                                                                                     |         |                                                              |
|-------------------------|----------------------------------------------------------------------------------------------------------|-------------------------------------------|-------------------------------------------------------------------------------------|---------|--------------------------------------------------------------|
|                         | Au/CeO-RGO, 0.1 M HCl                                                                                    | Room temperature and atmospheric pressure | 8.3 $\mu\text{g h}^{-1} \text{mg}^{-1}$                                             | 10.1%   | <i>Adv. Mater.</i> <b>2017</b> , <i>29</i> , 1700001.        |
|                         | Fe <sub>2</sub> O <sub>3</sub> /CNT, KHCO <sub>3</sub>                                                   | Room temperature and atmospheric pressure | 0.22 $\mu\text{g h}^{-1} \text{cm}^{-2}$                                            | <0.05 % | <i>Angew. Chem. Int. Ed.</i> <b>2017</b> , <i>56</i> , 2699. |
|                         | Polypyrrole, 0.1 M Li <sub>2</sub> SO <sub>4</sub> , 0.03 M H <sup>+</sup> solution                      | 60 bar N <sub>2</sub>                     | 901 $\mu\text{g}$ (5 h)                                                             | ----    | <i>J. Electroanal. Chem.</i> <b>2010</b> , <i>638</i> , 119. |
|                         | ZnSe, 1 M KOH                                                                                            | Room temperature                          | 391 $\mu\text{g h}^{-1} \text{cm}^{-2}$                                             | 1.3%    | <i>J. Electroanal. Chem.</i> <b>1990</b> , <i>291</i> , 269. |
|                         | Mo nanofilm, 0.01 M H <sub>2</sub> SO <sub>4</sub>                                                       | Room temperature and atmospheric pressure | 1.89 $\mu\text{g h}^{-1} \text{cm}^{-2}$                                            | 0.72%   | <i>J. Mater. Chem. A</i> <b>2017</b> , <i>5</i> , 18967.     |
|                         | Pt/C, solid state electrolyte                                                                            | Room temperature and atmospheric pressure | 69.77 $\mu\text{g h}^{-1} \text{cm}^{-2}$                                           | 0.55%   | <i>Sci. Rep.</i> <b>2013</b> , <i>3</i> , 1145.              |
|                         | Amorphous Bi <sub>4</sub> V <sub>2</sub> O <sub>11</sub> -crystalline CeO <sub>2</sub> hybrid, 0.1 M HCl | Room temperature and atmospheric pressure | 23.21 $\mu\text{g h}^{-1} \text{mg}^{-1}$                                           | 10.16 % | <i>Angew. Chem.</i> <b>2018</b> , <i>130</i> , 6181.         |
|                         | Ru/C, solid polymer electrolyte                                                                          | 20 °C                                     | 0.21 $\mu\text{g h}^{-1} \text{cm}^{-2}$                                            | 0.28%   | <i>Chem. Commun.</i> <b>2000</b> , <i>17</i> , 1673.         |
|                         | V <sub>o</sub> -poor NiCo <sub>2</sub> O <sub>4</sub> @HNCP                                              | Room temperature and atmospheric pressure | 1.6 $\mu\text{g h}^{-1} \text{cm}^{-2}$ or 6.9 $\mu\text{g h}^{-1} \text{mg}^{-1}$  | 1.8%    | This work                                                    |
|                         | V <sub>o</sub> -rich NiCo <sub>2</sub> O <sub>4</sub> @HNCP                                              | Room temperature and atmospheric pressure | 4.1 $\mu\text{g h}^{-1} \text{cm}^{-2}$ or 17.8 $\mu\text{g h}^{-1} \text{mg}^{-1}$ | 5.3%    | This work                                                    |
| <b>Harsh conditions</b> | Fe/Ru (Haber-Bosch method)                                                                               | 350~550 °C, 200~300 atm                   | ~20% (N <sub>2</sub> conversi                                                       | ----    | <i>Chem. Soc. Rev.</i> <b>2014</b> , <i>43</i> , 5183.       |

|  |                                                                                                                    |                                  |                                              |      |                                                              |
|--|--------------------------------------------------------------------------------------------------------------------|----------------------------------|----------------------------------------------|------|--------------------------------------------------------------|
|  |                                                                                                                    |                                  | on rate)                                     |      |                                                              |
|  | Ru (7.8 wt%)-<br>Y <sub>5</sub> Si <sub>3</sub>                                                                    | 400 °C                           | 32.3 μg<br>h <sup>-1</sup> mg <sup>-1</sup>  | ---- | <i>J. Am. Chem. Soc.</i> <b>2016</b> ,<br><i>138</i> , 3970. |
|  | Pd, perovskite-type<br>solid electrolyte<br>SrCe <sub>0.95</sub> Yb <sub>0.05</sub> O <sub>3</sub>                 | 570 °C                           | 275.4 μg<br>h <sup>-1</sup> cm <sup>-2</sup> | ---- | <i>Science</i><br><b>1998</b> , 282,<br>98.                  |
|  | Fe <sub>2</sub> O <sub>3</sub> , molten<br>hydroxide                                                               | 250 °C, 25 bar<br>N <sub>2</sub> | 35% (N <sub>2</sub><br>conversi<br>on rate)  | ---- | <i>Science</i><br><b>2014</b> , 345,<br>637.                 |
|  | Pr <sub>0.6</sub> Ba <sub>0.4</sub> Fe <sub>0.8</sub> Cu <sub>0.2</sub><br>O <sub>3-δ</sub> , mixed<br>electrolyte | 400 °C                           | 6.55 μg<br>h <sup>-1</sup> cm <sup>-2</sup>  | ---- | <i>App. Catal. B-Environ.</i><br><b>2014</b> , 212,<br>152.  |

**FE:** Faradaic efficiency.

**Table S3.** The free energies of various states during NRR process.

| States                            | Free energy (eV)                                      |                                                       |
|-----------------------------------|-------------------------------------------------------|-------------------------------------------------------|
|                                   | V <sub>o</sub> -rich NiCo <sub>2</sub> O <sub>4</sub> | V <sub>o</sub> -poor NiCo <sub>2</sub> O <sub>4</sub> |
| NN*                               | -0.05                                                 | -0.57                                                 |
| NNH*                              | 0.28                                                  | 0.89                                                  |
| HNNH*                             | -0.54                                                 | 0.40                                                  |
| HNNH <sub>2</sub> *               | -0.20                                                 | 0.22                                                  |
| H <sub>2</sub> NNH <sub>2</sub> * | -0.82                                                 | -0.42                                                 |
| H <sub>2</sub> N*                 | -0.46                                                 | -0.41                                                 |

## 5. References:

- [1] J. P. Perdew, K. Burke and M. Ernzerhof, *Phys. Rev. Lett.*, 1996, **77**, 3865.
- [2] H. J. Monkhorst and J. D. Pack, *Phys. Rev. B: Solid State*, 1976, **13**, 5188.
- [3] G. Henkelman and H. Jónsson, *J. Chem. Phys.*, 2000, **113**, 9978.
- [4] J. X. Zhao and Z. F. Chen, *J. Am. Chem. Soc.*, 2017, **139**, 12480.
- [5] S. Suarez and D. Paterno, *J. Power Sources*, 2016, **331**, 544.
- [6] S. Z. Andersen, V. Čolić, S. Yang, J. A. Schwalbe, A. C. Nielander, J. M. McEnaney, K. Enemark-Rasmussen, J. G. Baker, A. R. Singh, B. A. Rohr, M. J. Statt, S. J. Blair, S. Mezzavilla, J. Kibsgaard, P. C. K. Vesborg, M. Cargnello, S. F. Bent, T. F. Jaramillo, I. E. L. Stephens, J. K. Nørskov and I. Chorkendorff, *Nature*, 2019, **570**, 504.
- [7] B. H. R. Suryanto, H.-L. Du, D. Wang, J. Chen, A. N. Simonov and D. R. MacFarlane, *Nat. Catal.*, 2019, **2**, 290.
- [8] B. Hu, M. Hu, L. Seefeldt and T. L. Liu, *ACS Energy Lett.*, 2019, **4**, 1053.
- [9] H. Du, T. R. Gengenbach, R. Hodgetts, D. R. MacFarlane and A. N. Simonov, *ACS Sustainable Chem. Eng.*, 2019, **7**, 6839.
- [10] M. A. Shipman and M. D. Symes, *Electrochim. Acta*, 2017, **258**, 618.
- [11] G. W. Watt and J. D. Chrisp, *Anal. Chem.*, 1952, **24**, 2006.
